1 **Single-cell transcriptomics reveals expansion of cytotoxic CD4 T-cells in supercentenarians**

2

3 Kosuke Hashimoto<sup>1</sup>, Tsukasa Kouno<sup>1</sup>, Tomokatsu Ikawa<sup>1</sup>, Norihito Hayatsu<sup>1</sup>, Yurina Miyajima<sup>1</sup>,  
4 Haruka Yabukami<sup>1</sup>, Tommy Terooatea<sup>1</sup>, Takashi Sasaki<sup>2</sup>, Takahiro Suzuki<sup>1</sup>, Matthew Valentine<sup>1</sup>,  
5 Giovanni Pascarella<sup>1</sup>, Yasushi Okazaki<sup>1</sup>, Harukazu Suzuki<sup>1</sup>, Jay W. Shin<sup>1</sup>, Aki Minoda<sup>1</sup>, Ichiro  
6 Taniuchi<sup>1</sup>, Hideyuki Okano<sup>2</sup>, Yasumichi Arai<sup>2</sup>, Nobuyoshi Hirose<sup>2,\*</sup>, Piero Carninci<sup>1,\*</sup>

7

8 1. RIKEN Center for Integrative Medical Sciences, Yokohama, Kanagawa, Japan

9 2. Centre for Supercentenarian Medical Research, Keio University School of Medicine, Tokyo,  
10 Japan

11

12 **Corresponding authors:**

13 \* Piero Carninci (carninci@riken.jp)

14 RIKEN Yokohama, 1-7-22 Suehiro-cho, Tsurumi-ku, Yokohama, Kanagawa 230-0045, Japan

15

16 \* Nobuyoshi Hirose (hirosen@z8.keio.jp)

17 Keio University School of Medicine, 35, Shinanomachi, Shinjuku-ku, Tokyo 160-8582, Japan

18

19 **Classification:** BIOLOGICAL SCIENCES, Immunology and Inflammation

20

21 **Keywords:** Centenarian, Single-cell transcriptome, CD4 CTL, aging

22

23 **Abstract**

24 Supercentenarians, people who have reached 110 years of age, are a great model of  
25 healthy aging. Their characteristics of delayed onset of age-related diseases and compression of  
26 morbidity imply that their immune system remains functional. Here we performed single-cell  
27 transcriptome analysis of 61,202 peripheral blood mononuclear cells (PBMCs), derived from  
28 seven supercentenarians and five younger controls. We identified a marked increase of cytotoxic  
29 CD4 T-cells (CD4 CTLs) coupled with a substantial reduction of B-cells as a novel signature of  
30 supercentenarians. Furthermore, single-cell T-cell receptor sequencing of two supercentenarians  
31 revealed that CD4 CTLs had accumulated through massive clonal expansion, with the most  
32 frequent clonotypes accounting for 15% to 35% of the entire CD4 T-cell population. The CD4  
33 CTLs exhibited substantial heterogeneity in their degree of cytotoxicity as well as a nearly  
34 identical transcriptome to that of CD8 CTLs. This indicates that CD4 CTLs utilize the  
35 transcriptional program of the CD8 lineage while retaining CD4 expression. Our study reveals  
36 that supercentenarians have unique characteristics in their circulating lymphocytes, which may  
37 represent an essential adaptation to achieve exceptional longevity by sustaining immune  
38 responses to infections and diseases.

39

40 **Significance**

41           Exceptionally long-lived people such as supercentenarians tend to spend their entire  
42 lives in good health, implying that their immune system remains active to protect against  
43 infections and tumors. However, their immunological condition has been largely unexplored. We  
44 profiled thousands of circulating immune cells from supercentenarians at single-cell resolution,  
45 and identified a large number of CD4 T-cells that have cytotoxic features. This characteristic is  
46 very unique to supercentenarians, because generally CD4 T-cells have helper, but not cytotoxic,  
47 functions under physiological conditions. We further profiled their T-cell receptors, and revealed  
48 that the cytotoxic CD4 T-cells were accumulated through clonal expansion. The conversion of  
49 helper CD4 T-cells to a cytotoxic variety might be an adaptation to the late stage of aging.

50

51

52 Supercentenarians are rare individuals who reach 110 years of age. They are endowed  
53 with high resistance to lethal diseases such as cancer, stroke, and cardiovascular disease (1-4).  
54 Demographers in Canada estimated that the chance of living more than 110 years is as low as 1  
55 in 100,000 ([http://www.forum.umontreal.ca/forum\\_express/pages\\_a/demo.htm](http://www.forum.umontreal.ca/forum_express/pages_a/demo.htm)). According to  
56 the population census covering the whole territory of Japan in 2015  
57 (<http://www.stat.go.jp/english/data/kokusei/2015/pdf/outline.pdf>), the number of centenarians  
58 was 61,763, of which only 146 were supercentenarians. A distinctive feature of supercentenarians  
59 is a long healthy life-span, maintaining relatively high cognitive function and physical  
60 independence even after 100 years of age (5, 6). In other words, many supercentenarians can  
61 spend almost their entire lives in good health due to the delayed onset of age-related diseases and  
62 compression of morbidity (7). Therefore, supercentenarians can be considered a good model of  
63 successful aging, and understanding their attributes would be beneficial for super-aging societies.

64 Many functions of the immune system show a progressive decline with age, a  
65 phenomenon known as immunosenescence, leading to a higher risk of infection, cancer, and  
66 autoimmune diseases (8, 9). A low level of inflammation is the best predictor of successful aging  
67 at extreme old age, indicating the importance of maintaining the immune system (10). Age-related  
68 alterations are apparent in two primary lymphoid organs, thymus and bone marrow, which are  
69 responsible for the development of mature lymphocytes (11). In particular, elderly hematopoietic

70 stem cells in bone marrow exhibit a myeloid-biased differentiation potential (12, 13), which  
71 causes changes in the cell population of peripheral blood.

72 Numerous studies have examined age-related alterations in whole blood and peripheral  
73 blood mononuclear cells (PBMCs), derived from healthy donors in a wide range of age groups.  
74 Fluorescence activated cell sorting (FACS) and transcriptome sequencing technologies, which are  
75 extensively used to profile circulating immune cells, have revealed that the population makeup  
76 and expression levels of peripheral lymphocytes change dynamically with age. For example, the  
77 absolute number and percentage of peripheral blood CD19 B-cells decrease with age (14-16).  
78 Naïve T-cell numbers tend to decrease according to age, whereas antigen-experienced memory T-  
79 cell numbers increase with concomitant loss of co-stimulation factors CD27 and CD28 (17). This  
80 tendency is more pronounced for CD8 T-cells in cytomegalovirus seropositive donors (18). In  
81 parallel, transcriptome studies have reported a large number of age-associated genes in bulk  
82 peripheral blood that can be used to predict ‘transcriptomic age’ (19). However, most of the  
83 studies targeted donors from young to 100 years old, and the circulating immune cells in  
84 supercentenarians remain largely unexplored.

85 Single-cell transcriptomic methods have rapidly evolved in recent years. The accuracy  
86 of quantifying gene expression and the number of cells captured per experiment have been  
87 dramatically improved (20, 21). These methods have been applied to various subjects such as

88 finding signatures of aging in the human pancreas (22), observing infiltrating T-cells in tumors  
89 (23, 24), and characterizing diversity of cell types during brain development (25). Here we  
90 profiled circulating immune cells in supercentenarians at single-cell resolution and identified  
91 unique signatures in supercentenarians that could characterize healthy aging.

92

93

94 **Results**

95 *Single-cell transcriptome profiling of PBMCs*

96 We profiled fresh PBMCs derived from seven supercentenarians (SC1–SC7) and five  
97 controls (CT1–CT5, aged in their 50s to 80s) by using droplet-based single-cell RNA sequencing  
98 technology (10X Genomics) (26) (Figs. 1a and S1a). The total number of recovered cells was  
99 61,202 comprising 41,208 cells for supercentenarians (mean: 5,887 cells) and 19,994 cells for  
100 controls (mean: 3,999 cells), which is in the normal range of median gene and UMI counts per  
101 cell reported in the 10XQC database (<http://10xqc.com/index.html>) (Figs. 1b and S1b). Based on  
102 their expression profiles, we visualized the cells in two-dimensional space using t-SNE (t-  
103 distributed stochastic neighbor embedding), a method for non-linear dimensionality reduction.  
104 Using a k-means clustering algorithm, we found ten distinct clusters representing different cell  
105 types (Figs. 1c and S1c). We identified the major cell types comprising PBMCs, including: T cells  
106 (TC1 and TC2 clusters) characterized by *CD3* and T-cell receptor (*TRAC*) expression, B cells (BC  
107 cluster) characterized by *MS4A1* (*CD20*) and *CD19* expression, natural killer cells (NK cluster)  
108 characterized by *KLRF1* expression, two subsets of monocytes (M14 and M16 clusters)  
109 characterized *CD14* and *FCGR3A* (*CD16*) expression, respectively, and erythrocytes (EC cluster)  
110 characterized by *HBA1* (hemoglobin alpha locus 1) expression (Figs. 1d and S1d). We also found  
111 three small clusters, annotated as MKI67+ proliferating cells (MKI), dendritic cells (DC), and

112 megakaryocytes (MGK), based on the expression of established marker genes (Fig. S1e). Each of  
113 the clusters consisted of cells from more than eleven different donors, and there was no obvious  
114 batch effect leading to library-specific clusters (Fig. S1c).

115

### 116 *Significant reduction of B cells*

117 In previous FACS analyses using cell-surface markers, various age-associated  
118 population changes were observed in human PBMCs, such as B-cell reduction (15) and loss of  
119 naïve CD8 T-cells (18). To understand whether supercentenarians follow the common population  
120 changes, we compared the percentages of the immune cells in PBMCs between the  
121 supercentenarians and controls. Among the identified cell types in our single-cell transcriptome  
122 analysis, B cell numbers were significantly decreased in the supercentenarians compared with the  
123 controls ( $P = 0.0025$ , Wilcoxon rank sum test) (Fig. 2a). The median percentage of B cells in the  
124 seven supercentenarians (2%) was far below that in the controls (11%) and the reference values  
125 reported in a previous cohort study (27); in contrast, the populations of the other cell types were  
126 relatively stable and did not significantly change compared with the controls (Figs. 2a and S2a).  
127 The reduction of B cells was validated by FACS analysis of four supercentenarians (SC1–SC4)  
128 and three controls (CT1–CT3), which showed low levels of CD3– and CD19+ B-cell populations  
129 in supercentenarians (Figs. 2b and S2b). We also confirmed that the percentages of major cell



130 types (B cells, T cells, natural killer cells, and CD14+ monocytes) in PBMCs were consistent with  
131 those measured by FACS using canonical markers (Figs. 2c and S2b). We further clustered the B  
132 cells into three distinct subtypes (BC1, BC2, and BC3) by using k-means clustering (Figs. 2d and  
133 S2c). BC1 corresponds to naïve B-cells due to the presence of *IGHD*, an immunoglobulin isotype  
134 expressed before class switching, and absence of the activation marker *CD27*. BC2 corresponds  
135 to quiescent memory B-cells, characterized by expression of *CD27*, *IGHG1*, and *IGHA1* (Figs.  
136 2e and S2d). BC3, which accounts for a small fraction, albeit one with contributions from all  
137 donors, shows distinct features of plasma cells such as high levels of immunoglobulins (*IGHA*  
138 and *IGHG*), expression of *CD38*, and loss of *MS4A1* (*CD20*) (Figs. 2e and S2e). Among these  
139 three B-cell subtypes in PBMCs, the percentage of naïve B-cells was significantly lower in  
140 supercentenarians compared with the controls ( $P = 0.005$ , Wilcoxon rank sum test) and the  
141 percentage of memory B-cells also tended to be lower in supercentenarians but the difference was  
142 not significant ( $P = 0.073$ ) (Fig. 2f). Therefore, the decrease in naïve B-cells was the major source  
143 of the B-cell reduction in supercentenarians.

144

#### 145 *Expansion of cytotoxic T-cells in supercentenarians*

146 In contrast to the profound reduction of B cells, the T-cell fraction remained stable at  
147 around 40% of PBMCs according to both the transcriptome data (TC in Fig. 2a) and the FACS

148 analysis (CD3+CD19<sup>-</sup> in Fig. 2c). However, two T-cell clusters, TC1 and TC2, were imbalanced  
149 between supercentenarians and controls: TC1 was significantly diminished ( $P = 0.0025$ ,  
150 Wilcoxon rank sum test), whereas TC2 was significantly expanded ( $P = 0.0025$ ) in  
151 supercentenarians (Fig. 3a). To better understand this T-cell specific population shift, we extracted  
152 all the cells from TC1 and TC2 for further analysis using the Seurat R package (version 2.3.0)  
153 (28). A clustering algorithm based on shared nearest neighbor modularity optimization  
154 implemented in Seurat produced two major clusters: Seurat\_TC1 and Seurat\_TC2, corresponding  
155 to the original TC1 and TC2 clusters (Figs. 3b and S3a). We then compared these two clusters  
156 and identified 332 differentially expressed genes, of which the most significant gene distinctively  
157 expressed in Seurat\_TC2 was *NKG7*, a component of granules in cytotoxic lymphocytes. In  
158 addition, the top 20 most significant genes included multiple genes encoding cytotoxic effector  
159 molecules responsible for the perforin/granzyme apoptosis pathway, such as *GZMH*, *GZMB*,  
160 *GZMA*, and *PRF1* (Fig. 3c and S3b). In contrast, Seurat\_TC1 was characterized by expression of  
161 *CCR7* and *SELL* (encoding CD62L), which are required for lymph node migration (Fig. S3c).  
162 These genes are normally expressed in naïve and central memory T-cells, but not in cytotoxic  
163 effector memory T-cells (29), indicating that the primary factor separating the two clusters is  
164 cytotoxicity. Perforin/granzyme<sup>+</sup> cells were predominantly found in the supercentenarians (Fig.  
165 3d), whereas CCR7<sup>+</sup> non-cytotoxic cells were more abundant in the controls (Fig. S3d). We then

166 examined how many of the four cytotoxic genes (*GZMH*, *GZMB*, *GZMA*, and *PRFI*) showed  
167 detectable expression in each single cell. As expected, for both the supercentenarians and controls,  
168 the vast majority of cells in the non-cytotoxic cluster (Seurat\_TC1) expressed either zero or one  
169 cytotoxic gene(s) (Fig. 3e left). In the cytotoxic cluster (Seurat\_TC2), cells that expressed all four  
170 genes were abundant in supercentenarians but rare in controls, indicating that the level of  
171 cytotoxicity per cell might be higher in supercentenarians (Fig. 3e right). Cytotoxic T-cells were  
172 expanded in supercentenarians, reaching 90% of T cells in some individuals (Fig. 3f). This was  
173 in sharp contrast to controls where cytotoxic T-cells made up approximately 10% to 20% of the  
174 total T-cell population.

175

#### 176 *Expansion of cytotoxic CD4 T-cells in supercentenarians*

177 In general, cytotoxic T-cells are CD8+ and non-cytotoxic helper T-cells are CD4+, with  
178 both being derived from double positive thymocytes (30). Therefore, a simple interpretation of  
179 our results is that there is an increase in CD8+ T-cells in supercentenarians. However, *CD8A* and  
180 *CD8B*, which encode the two components of CD8, were expressed only in a subset of cytotoxic  
181 T-cells, whereas *CD4* and *TRDC* (T-cell receptor delta constant) were expressed in the other  
182 subsets, suggesting the presence of three subsets of cytotoxic T-cells: CD8 CTLs (cytotoxic T-  
183 lymphocytes), CD4 CTLs, and  $\gamma\delta$  T-cells (Fig. 4a). To investigate cytotoxic T-cells other than

184 CD8 CTLs, we manually defined CD4 CTLs and  $\gamma\delta$  T-cells based on ranges of *CD4*, *CD8*, and  
185 *TRDC* expression (Figs. 4a lower right and S4a). Previous studies reported that CD4 CTLs  
186 account for a tiny fraction of CD4+ T-cells in PBMCs (e.g., mean 2.2% in 64 healthy donors (31)).  
187 Here, the supercentenarians show significantly higher levels of CD4 CTLs (mean, 25.3% of total  
188 T-cells) than in the controls (mean, 2.8%) ( $P = 0.0025$ , Wilcoxon rank sum test), as well as higher  
189 levels of CD8 CTLs than in the controls ( $P = 0.0025$ ), whereas the population of  $\gamma\delta$  T-cells was  
190 moderate in size and comparable to that in the controls (Figs. 4b and S4b). To validate the  
191 expansion of CD4 CTLs, we performed FACS analysis of six supercentenarians (SC1 and SC5–  
192 SC7 [studied above] and SC9 and SC10), one semi-supercentenarian (over 105 years old; SC8),  
193 and five controls (CT4 and CT5 [studied above] and CT6–CT8) (Fig. S1a) using antibodies  
194 against CD3, CD4, CD8, and GZMB. According to the CD4/CD8 staining profile (gated on  
195 CD3+), the T cells in the supercentenarians were not predominantly CD8+ T-cells (Figs. 4c and  
196 S4c). We then asked how many of the CD4+ T-cells retained in supercentenarians were cytotoxic  
197 by using the CD4/GZMB staining profile. Remarkably, CD4+GZMB+ T-cells were quite  
198 abundant in the supercentenarians, in which at least 10% (mean, 30.1%) of T cells are CD4 CTLs  
199 in all tested supercentenarian samples ( $n = 7$ ) (Fig. 4d). The percentages of CD4 CTLs  
200 (CD4+GZMB+ T cells) in the total T-cell populations were significantly higher in the  
201 centenarians than in the controls ( $P = 0.018$ , Wilcoxon rank sum test) (Figs. 4e and S4d).

202 Furthermore, GZMB+ cells were more abundant than GZMB- cells in both CD4 and CD8 T-cell  
203 populations in five out of seven tested (semi-)supercentenarians but none of the controls,  
204 indicating expansion of CD4 CTLs as well as CD8 CTLs (Fig. S4e). The percentages of CD4  
205 CTLs correlated well between single-cell RNA-Seq and FACS analyses according to the  
206 comparison of the six commonly analyzed samples (four supercentenarians and two controls) (Fig.  
207 4f). Thus, the high level of CD4 CTLs in supercentenarians was supported by two independent  
208 methods.

209

#### 210 *Cell state transition of CD4 CTLs during T-cell differentiation*

211 CD4 CTLs have been identified in differentiated T-cell subsets: i.e., effector memory  
212 (TEM) and effector memory re-expressing CD45RA (TEMRA) cells, which are often associated  
213 with a distinct surface phenotype including CCR7-, CD27-, CD28-, and CD11A+ (31, 32). To  
214 understand the CD4+GZMB+ T-cells in the context of differentiation, we constructed single-cell  
215 trajectories using the Monocle 2 (version 2.4.0) R package (33); all T cells in TC1 and TC2 were  
216 placed on these trajectories based on changes in their transcriptomes (Figs. 5a and S5a).  
217 Consistent with the clustering analyses, TC1 (the non-cytotoxic cluster) was mostly distributed  
218 throughout the early pseudotime, whereas TC2 (the cytotoxic cluster) was found mostly in later  
219 pseudotime, showing a clear temporal separation of the two (Fig. S5b). We then examined the

220 transition of expression values along pseudotime for a panel of established marker genes  
221 associated with T-cell differentiation (29). As mentioned above, *CCR7* expression is a primary  
222 marker of central memory T-cells, and distinguishes them from effector memory T-cells. We  
223 observed rapid reduction of *CCR7* expression followed by the gradual loss of costimulatory  
224 molecules *CD27* and *CD28* (Fig. 5b) indicating that early pseudotime corresponds to naïve and  
225 central memory T-cells. The results also showed a gradual increase of expression of *GZMA*,  
226 *GZMB*, and *PRF1*, which encode cytotoxic molecules, as well as concordant patterns of  
227 expression of transcripts encoding adhesion and migration molecules (Figs. 5b and S5c)  
228 indicating progressive differentiation states of effector memory T-cells, corresponding to late  
229 pseudotime. One of the branches showed enriched expression of *FOXP3* and *IL2RA* (*CD25*),  
230 primary markers of regulatory T-cells (Figs. S5d and S5e). Altogether the backbone of pseudotime  
231 estimated by Monocle 2 recapitulated T-cell differentiation starting from naïve and central  
232 memory to terminally differentiated effector memory states with a branched trajectory of  
233 regulatory T-cell-like features. We examined the distributions of T cells along pseudotime  
234 separately for supercentenarians and controls. The T cells of the supercentenarians were clearly  
235 shifted toward more differentiated states compared with those of the controls (Fig. 5c): nearly  
236 60% of T cells in the controls were placed in the earliest pseudotime corresponding to naïve and  
237 central memory T-cells, whereas T cells of supercentenarians were enriched in late pseudotime.

238 Next, we examined the distributions of CD4 CTLs (n = 5274) and CD8 CTLs (n = 7643), which  
239 were defined in Figures 4a and S4a. CD4 CTLs were distributed in the latter half of pseudotime  
240 in a similar way to CD8 CTLs (Figs. 5d and S5f), indicating a similar differentiation process  
241 despite fundamental functional differences between the two cell types. Indeed, mean expression  
242 values were highly correlated between CD4 and CD8 CTLs, with the exception of a small number  
243 of genes (Fig. 5e). The expression of four major cytotoxic genes *GZMA*, *GZMB*, *PRF1*, and *NKG7*,  
244 which are known to be abundant in CD4 CTLs (31, 34), increased along the latter half of  
245 pseudotime in a similar manner between CD4 and CD8 CTLs; however, the expression of two  
246 other major cytotoxic genes, *GZMH* and *GNLY*, showed slightly different patterns for CD4 and  
247 CD8 CTLs (Figs. 5f and S5g). Other exceptions were *KLRB1* and *KLRD1*, which encode two  
248 killer cell lectin-like receptors; at all time points, expression of these genes was higher in either  
249 CD4 or CD8 CTLs. In summary, we found a seemingly heterogeneous population of CD4 CTLs,  
250 which could be further categorized in pseudotime according to differentiation states. These  
251 differentiation states were characterized by progressive transcriptional changes, in a similar  
252 fashion to CD8 CTLs.

253

#### 254 *Clonal expansion of CD4 CTLs*

255 To explore the mechanism by which CD4 CTLs increased in supercentenarians, we

256 performed an integrative analysis of the single-cell transcriptome and the T-cell receptor (TCR)  
257 repertoire. Firstly, we asked whether the high level of CD4 CTLs was reproducible at a different  
258 time point to that studied above. We re-collected fresh whole blood samples from two  
259 supercentenarians (SC1 and SC2) about 1.5 years after the first collection, and isolated CD4+ T-  
260 cells by negative selection (Fig. 6a). The single cell transcriptome profile generated using the  
261 Seurat R package confirmed high enrichment of T-cells, characterized by the expression of *CD3*  
262 genes (Figs. 6b and S6a). B-cells and CD14 monocytes were mostly depleted, whereas natural  
263 killer cells and erythroid cells were not completely depleted in the libraries (Fig. S6b). In the T-  
264 cell population, CD4+ T-cells were strongly enriched and CD8+ T-cells were depleted (Figs. 6c  
265 and S6c). We could recover transcripts encoding TCR alpha and beta chains in most of the T-cells,  
266 which were further clustered into two distinct cell types, based on the expression profiles (Figs.  
267 6d and S6d). One of the clusters comprised CD4 CTLs, characterized by the co-expression of  
268 *GZMH*, *GZMA*, *GZMB*, *NKG7*, and *PRF1* as well as low expression of *SELL*, *CD27*, and *CCR7*  
269 (Figs. 6e, S6e, and S6f). CD4 CTLs accounted for about 62% (SC1) and 48% (SC2) of the CD4  
270 T-cells in this analysis, which is consistent with the first sample collection from the same donor  
271 (Fig. 4b). This observation indicates that CD4 CTLs of supercentenarians are not transiently  
272 accumulated but persist in the blood for years.

273 Secondly, we assessed the diversity of TCRs in CD4 CTLs and non-cytotoxic helper T-



274 cells. We defined clonotypes based on CDR3 sequences of both TCR alpha and beta chains using  
275 the Cell Ranger analysis pipeline. We identified clonally expanded CD4 CTLs, which have only  
276 69 clonotypes, among 908 cells in SC1; and 325 clonotypes among 2211 cells in SC2 (Fig. 6f).  
277 Moreover, the top 10 clonotypes occupied more than 70% of CD4 CTLs but less than 10% of  
278 helper T-cells (Fig. 6g). Both supercentenarians had one massively expanded clonotype, “CT01”,  
279 which accounted for 15% to 35% of the entire CD4 T-cell population (Fig. 6h), and had distinct  
280 combinations of TCR alpha and beta chains (TRAV12-3/TRAJ23 and TRBV3-1/TRBD2/TRBJ2-  
281 7 for SC1 and TRAV12-1/TRAJ20 and TRBV9/TRBD2/TRBJ1-1 for SC2). The cells of both  
282 “CT01” and “CT02” were mostly distributed in the CD4 CTL cluster with cytotoxic features (Fig.  
283 S6g) and were rarely placed in the CD4 helper T-cell cluster. The low TCR diversity of CD4 CTLs  
284 is in sharp contrast to helper T-cells in the same donor as well as younger controls, including  
285 publicly available CD4 and CD8 T-cells (Figs. 6h and S6h).

286 To understand the differentiation status of clonally expanded cells, we constructed a  
287 single-cell trajectory of CD4 T-cells using Monocle 2. The CD4 T-cells were distributed along  
288 pseudotime, following an increasingly differentiated trajectory, as evidenced by the marker gene  
289 expression patterns (Fig. S6i). As expected, at the late pseudotime, the top two expanded  
290 clonotypes CT01 and CT02 were enriched with highly expressed cytotoxic genes (Figs. 6i and  
291 S6i). Nevertheless, a subset of these cells was found in less differentiated states, indicating that a

292 large number of CD4 T-cell clones with the same TCRs but at different levels of differentiation

293 are circulating in the blood.

294

## 295 **Discussion**

296 Here, we identified signatures of supercentenarians in circulating lymphocytes by using  
297 single-cell transcriptome analyses. In particular, CD4 CTLs were strongly expanded with distinct  
298 expression profiles including the activation of *GZMA*, *GZMB*, *GZMH*, *PRF1*, *NKG7* (*TIA-1*),  
299 *GNLY*, *CD40LG*, *KLRG1*, *KLRB1*, and *ITGAL* (*CD11A*) and the suppression of *CCR7*, *CD27*,  
300 *CD28*, and *IL7R* (Figs. 3d, 4a, 5b, and 5f). The results of single-cell TCR repertoire analysis of  
301 two supercentenarians suggest that the cell state transition of CD4 T-cells is at least partially  
302 explained by clonal expansion due to repeated stimulation with the same antigen. Here we discuss  
303 potential functions of CD4 CTLs in the late-stage of aging in terms of protective roles against  
304 tumor development and viral infections.

305 The primary function of CD4 T-cells, generally called helper T cells, is the regulation  
306 of immune responses using various cytokines, rather than direct elimination of target cells using  
307 cytotoxic molecules. Nevertheless, the presence of CD4 T-cells with cytotoxic features, namely  
308 CD4 CTLs, has been repeatedly reported in humans and mice (31, 32, 35). The reported fractions  
309 of CD4 CTLs are generally as low as a few percent of the total CD4 T-cells in healthy PBMCs  
310 (31, 36), whereas the size of the CD4 CTL fraction in the supercentenarians analyzed was on  
311 average 25% of T-cells, as measured by RNA-Seq and supported by the independent FACS  
312 measurements (Figs. 4b and 4e). More intriguingly, five out of seven supercentenarians analyzed

313 by FACS had more GZMB+ than GZMB- CD4 T-cells (Fig. 4d). The physiological role of the  
314 expanded CD4 CTLs remains unclear in humans, however a recent single-cell transcriptome study  
315 identified tumor-infiltrating CD4 CTLs in human hepatocellular carcinoma (23). In addition,  
316 several studies demonstrate that CD4 CTLs have the ability to directly kill tumor cells and  
317 eradicate established tumors in an MHC class II-dependent manner in mouse models (37, 38).  
318 Importantly, CD8 CTLs recognize class I MHC molecules present in nearly all cells. In contrast  
319 CD4 CTLs recognize class II MHC molecules, which are usually absent in normal non-immune  
320 cells, but present in a subset of tumor cells (39). This indicates that CD4 CTLs might contribute  
321 tumor immunity against established tumors, and may have an important role in  
322 immunosurveillance, helping to identify and remove incipient tumor cells abnormally activating  
323 class II MHC molecules.

324 Another potential function of CD4 CTLs is anti-viral immunity. A growing number of  
325 studies have demonstrated the direct cytotoxic activity, protective roles, and the associated  
326 induction of CD4 CTLs against various viruses such as dengue virus, influenza virus, hepatitis  
327 virus, CMV (cytomegalovirus), and HIV (human immunodeficiency virus) (40-44). Clonally  
328 expanded CD4 CTLs with virus-specific TCRs have been identified in dengue virus-positive  
329 donors (36). The association of CD4 CTLs with virus infection suggests that CD4 CTLs have  
330 accumulated in supercentenarians at least partially through clonal expansions triggered by

331 repeated viral exposure. Although some important genes such as *CRTAM* and *ADGRG1* (*GPR56*)  
332 have been reported (32, 45), the exact molecular mechanism of the conversion from CD4 helper  
333 T-cells to CD4 CTLs is still unclear. Our transcriptome data show the striking similarity of gene  
334 expression and differentiation between CD4 CTLs and CD8 CTLs (Figs. 5d and 5e), suggesting  
335 that CD4 CTLs use the CD8 transcriptional program internally, while retaining CD4 expression  
336 on the cell surface. This agrees with the previous finding that CD4 helper T-cells can be  
337 reprogrammed into CD4 CTLs by the loss of ThPOK (also known as *ZBTB7B*), the master  
338 regulator of CD4/CD8 lineage commitment, with concomitant activation of CD8-lineage genes  
339 (46). The reinforcement of the cytotoxic ability by the conversion of CD4 T-cells in  
340 supercentenarians might be an adaptation to the late stage of aging, in which the immune system  
341 needs to eliminate abnormal or infected cells more frequently.  
342

343 **Methods**

344 *Human blood samples*

345 All experiments using human samples in this study were approved by the Keio  
346 University School of Medicine Ethics Committee (approval number, 20021020) and the ethical  
347 review committee of RIKEN (approval number, H28-6). Fresh whole blood from  
348 supercentenarians, their offspring residing with them, and unrelated donors was collected in 2-ml  
349 tubes containing EDTA (ethylene diamine tetraacetic acid). PBMCs were isolated from whole  
350 blood within 8 h of sample collection by using SepMate-15 tubes (STEMCELL Technologies)  
351 with Ficoll-Paque Plus (GE Healthcare Life Sciences) according to the manufacturer's  
352 instructions. Briefly, each blood sample was diluted with an equal volume of phosphate buffered  
353 saline plus 2% fetal bovine serum (FBS), added into a SepMate tube, and centrifuged at 1200 ×  
354 g for 10 min at room temperature. Enriched mononuclear cells were washed with phosphate  
355 buffered saline plus 2% FBS and twice centrifuged at 300 × g for 8 min. Cell numbers and  
356 viability were measured using a Countess II Automated Cell Counter (Thermo Fisher Scientific).

357

358 *Single-cell library preparation*

359 Single-cell libraries were prepared from freshly isolated PBMCs by using Chromium  
360 Single Cell 3' v2 Reagent Kits (26). The cells and kit reagents were mixed with gel beads

361 containing barcoded oligonucleotides (UMIs) and oligo dTs (used for reverse transcription of  
362 polyadenylated RNAs) to form reaction vesicles called GEMs (Gel Bead-in-Emulsions). The  
363 barcoded cDNAs in each GEM were pooled for PCR amplification, and adapter and sample  
364 indices were added. Single-cell libraries were sequenced with paired-end reads on the Illumina  
365 HiSeq 2500 platform, with mostly one sample per lane. The remaining PBMCs were suspended  
366 in CELLBANKER cryopreservation medium (ZENOAQ), and stored at  $-80^{\circ}\text{C}$ .

367

#### 368 *Single-cell data processing*

369 The analysis pipelines in Cell Ranger version 2.1.0 were used for sequencing data  
370 processing. FASTQ files were generated using *cellranger mkfastq* with default parameters. Then,  
371 *cellranger count* was run with `--transcriptome=refdata-cellranger-GRCh38-1.2.0` for each sample,  
372 in which reads had been mapped on the human genome (GRCh38/hg38) using STAR (version  
373 2.5.1b) (47) and UMIs were counted for each gene. The outputs of *cellranger count* for individual  
374 samples were integrated using *cellranger aggr* with `--normalize=mapped`, in which read depths  
375 are normalized based on the confidently mapped reads. This command also runs principal  
376 component analysis (PCA), t-distributed stochastic neighbor embedding (tSNE), and k-means  
377 clustering algorithms to visualize clustered cells in two-dimensional space. The output of  
378 *cellranger aggr* was loaded into R by using an R package, Cell Ranger R Kit (version 2.0.0),

379 developed by 10X Genomics (<http://cf.10xgenomics.com/supp/cell-exp/rkit-install-2.0.0.R>).

380 Log-normalized expression values of all annotated genes were calculated using two functions,

381 *normalize\_barcode\_sums\_to\_median* and *log\_gene\_bc\_matrix*, implemented in the R package.

382

### 383 *Analysis of B-cell subsets*

384 Cells categorized in the B-cell cluster by the k-means clustering were extracted and saved as a

385 file using the *save\_cellranger\_matrix\_h5* function in the R package Cell Ranger R Kit. This file

386 was loaded into *cellranger reanalyze* to re-run PCA, tSNE, and k-means (k = 3) clustering

387 algorithms. Wilcoxon rank sum test was applied to compare percentages of B-cells between the

388 supercentenarians and controls using the *wilcox.test* function in R.

389

### 390 *Analysis of T-cell subsets*

391 The Seurat R package (version 2.3.0) was used to analyze T-cell subsets (TC1 and TC2). The

392 outputs of *cellranger count* were loaded using the *Read10X* function. Cells clustered in TC1 and

393 TC2 by the Cell Ranger analysis pipelines were extracted, and principal components were

394 calculated using *RunPCA* function. The first 16 principal components, based on the manual

395 inspection of the elbow plot (*PCElbowPlot*), were used for cell clustering (using the *FindClusters*

396 function with resolution 0.05) and tSNE visualization (using *RunTSNE*). Differentially expressed



397 genes were identified using the *FindAllMarkers* function, and the top 20 genes were visualized in  
398 a heatmap using the *DoHeatmap* function. CD4 CTL, CD8 CTL, and  $\gamma\delta$  T-cell clusters were  
399 manually defined in the interactive mode of the t-SNE plot by using the *TSNEPlot* function with  
400 `do.identify=TRUE` based on the expression of marker genes. Wilcoxon rank sum test was applied  
401 to compare percentages of T-cell subtypes between the supercentenarians and controls using the  
402 `wilcox.test` function in R.

403

#### 404 *Pseudotime analysis*

405 Monocle 2 (version 2.4.0) was used to estimate a pseudo-temporal path of T-cell differentiation  
406 (33). Cells clustered in TC1 and TC2 by Cell Ranger analysis pipelines were loaded to create a  
407 Monocle object using the *newCellDataSet* function implemented in Monocle 2. The cells were  
408 ordered in pseudotime along a trajectory using *reduceDimension* with the DDRTree method and  
409 *orderCells* functions. Mean log-normalized expression values of selected marker genes were  
410 calculated for each bin from 0 to 12 pseudotime points.

411

#### 412 *Antibodies and flow cytometric analysis*

413 Cryopreserved PBMCs were thawed and suspended in FACS buffer (1× Hank's Balanced Salt  
414 Solution with 2% FBS and 0.2% NaN<sub>3</sub>). Monoclonal antibodies specific for human CD3ε

415 (UCHT1 and HIT3a), CD4 (RPA-T4), CD8 (RPA-T8), CD19 (HIB19), CD14 (M5E2), CD16  
416 (B73.1), CD56 (B159), and GzmB (GB11) were purchased from BD Pharmingen. Cell numbers  
417 were counted using a Countess II Automated Cell Counter. For intracellular staining, cells were  
418 fixed and permeabilized with IntraPrep Permeabilization Reagent (Beckman Coulter) according  
419 to the manufacturer's protocols. Cells were analyzed using FACS Aria III and FACS Aria SORP  
420 cell sorters (BD Biosciences) with FlowJo Software (version 10.4.2).

421

#### 422 *Single-cell TCR analysis*

423 RosetteSep Human CD4+ T Cell Enrichment Cocktail with SepMate-15 (STEMCELL  
424 Technologies) was used to remove non-CD4+ T-cells from fresh whole blood. A single-cell  
425 transcriptome library was prepared from the enriched CD4+ T-cells by using the Chromium  
426 Single Cell 5' Library Kit (10X Genomics) with 50 ng of cDNA amplified product. A single-cell  
427 TCR library was prepared using Chromium Single Cell V(D)J Enrichment Kits, Human (10X  
428 Genomics). The libraries were sequenced with paired-end 150-bp reads on the Illumina HiSeq  
429 2500 platform. Analysis pipelines in Cell Ranger version 3.0.2 (updated version was used for the  
430 5' single-cell and TCR libraries from version 2.1.0 used for the 3' single-cell libraries) were used  
431 for the sequencing data processing. TCR data were processed by running cellranger vdj with --  
432 reference=refdata-cellranger-vdj-GRCh38-alts-ensembl-2.0.0 to assemble TCR alpha and beta

433 chains and determine clonotypes. Transcriptome data were processed by running cellranger count  
434 with --transcriptome=refdata-cellranger-GRCh38-1.2.0. The Seurat R package (version 2.3.0)  
435 was used for cell clustering (FindClusters) and tSNE visualization (RunTSNE). Three control  
436 datasets of T-cell clonotypes analyzed by the same 10X Genomics kits were downloaded from the  
437 10X Genomics web sites below (need a simple registration).

438 T-cells: [http://cf.10xgenomics.com/samples/cell-vdj/3.0.0/vdj\\_v1\\_hs\\_pbmc2\\_t/vdj\\_v1\\_hs\\_pbmc2\\_t\\_clonotypes.csv](http://cf.10xgenomics.com/samples/cell-vdj/3.0.0/vdj_v1_hs_pbmc2_t/vdj_v1_hs_pbmc2_t_clonotypes.csv)

439 CD4 T-cells: [http://cf.10xgenomics.com/samples/cell-vdj/2.2.0/vdj\\_v1\\_hs\\_cd4\\_t/vdj\\_v1\\_hs\\_cd4\\_t\\_clonotypes.csv](http://cf.10xgenomics.com/samples/cell-vdj/2.2.0/vdj_v1_hs_cd4_t/vdj_v1_hs_cd4_t_clonotypes.csv)

440 CD8 T-cells: [http://cf.10xgenomics.com/samples/cell-vdj/2.2.0/vdj\\_v1\\_hs\\_cd8\\_t/vdj\\_v1\\_hs\\_cd8\\_t\\_clonotypes.csv](http://cf.10xgenomics.com/samples/cell-vdj/2.2.0/vdj_v1_hs_cd8_t/vdj_v1_hs_cd8_t_clonotypes.csv)

441

#### 442 **Data availability**

443 Raw UMI counts and normalized expression values for single-cell RNA-Seq are publicly  
444 available at <http://gerg.gsc.riken.jp/SC2018/>. Individual sequencing data will be available on  
445 request under the condition of approval of the ethics committee of Keio University and material  
446 transfer agreement.

447

448

449

450

451

452 **Reference**

453

- 454 1. Young RD (2018) Validated Living Worldwide Supercentenarians, Living and  
455 Recently Deceased: February 2018. *Rejuvenation Res* 21(1):67-69.
- 456 2. Pavlidis N, Stanta G, & Audisio RA (2012) Cancer prevalence and mortality in  
457 centenarians: a systematic review. *Crit Rev Oncol Hematol* 83(1):145-152.
- 458 3. Willcox DC, *et al.* (2008) Life at the extreme limit: phenotypic characteristics of  
459 supercentenarians in Okinawa. *J Gerontol A Biol Sci Med Sci* 63(11):1201-1208.
- 460 4. Evert J, Lawler E, Bogan H, & Perls T (2003) Morbidity profiles of centenarians:  
461 survivors, delayers, and escapers. *J Gerontol A Biol Sci Med Sci* 58(3):232-237.
- 462 5. Arai Y, *et al.* (2014) Physical independence and mortality at the extreme limit of life  
463 span: supercentenarians study in Japan. *J Gerontol A Biol Sci Med Sci* 69(4):486-  
464 494.
- 465 6. Schoenhofen EA, *et al.* (2006) Characteristics of 32 supercentenarians. *J Am*  
466 *Geriatr Soc* 54(8):1237-1240.
- 467 7. Andersen SL, Sebastiani P, Dworkis DA, Feldman L, & Perls TT (2012) Health span  
468 approximates life span among many supercentenarians: compression of morbidity  
469 at the approximate limit of life span. *J Gerontol A Biol Sci Med Sci* 67(4):395-405.
- 470 8. Deeks SG (2011) HIV infection, inflammation, immunosenescence, and aging. *Annu*  
471 *Rev Med* 62:141-155.
- 472 9. Aw D, Silva AB, & Palmer DB (2007) Immunosenescence: emerging challenges for  
473 an ageing population. *Immunology* 120(4):435-446.
- 474 10. Arai Y, *et al.* (2015) Inflammation, But Not Telomere Length, Predicts Successful  
475 Ageing at Extreme Old Age: A Longitudinal Study of Semi-supercentenarians.  
476 *EBioMedicine* 2(10):1549-1558.
- 477 11. Chinn IK, Blackburn CC, Manley NR, & Sempowski GD (2012) Changes in primary  
478 lymphoid organs with aging. *Semin Immunol* 24(5):309-320.
- 479 12. Pang WW, *et al.* (2011) Human bone marrow hematopoietic stem cells are increased  
480 in frequency and myeloid-biased with age. *Proc Natl Acad Sci U S A* 108(50):20012-  
481 20017.
- 482 13. Rossi DJ, *et al.* (2005) Cell intrinsic alterations underlie hematopoietic stem cell  
483 aging. *Proc Natl Acad Sci U S A* 102(26):9194-9199.
- 484 14. Dunn-Walters DK & Ademokun AA (2010) B cell repertoire and ageing. *Curr Opin*  
485 *Immunol* 22(4):514-520.
- 486 15. Ademokun A, Wu YC, & Dunn-Walters D (2010) The ageing B cell population:  
487 composition and function. *Biogerontology* 11(2):125-137.

- 488 16. Sansoni P, *et al.* (1993) Lymphocyte subsets and natural killer cell activity in  
489 healthy old people and centenarians. *Blood* 82(9):2767-2773.
- 490 17. Fagnoni FF, *et al.* (2000) Shortage of circulating naive CD8(+) T cells provides new  
491 insights on immunodeficiency in aging. *Blood* 95(9):2860-2868.
- 492 18. Wertheimer AM, *et al.* (2014) Aging and cytomegalovirus infection differentially and  
493 jointly affect distinct circulating T cell subsets in humans. *J Immunol* 192(5):2143-  
494 2155.
- 495 19. Peters MJ, *et al.* (2015) The transcriptional landscape of age in human peripheral  
496 blood. *Nat Commun* 6:8570.
- 497 20. Stubbington MJT, Rozenblatt-Rosen O, Regev A, & Teichmann SA (2017) Single-cell  
498 transcriptomics to explore the immune system in health and disease. *Science*  
499 358(6359):58-63.
- 500 21. Papalexi E & Satija R (2018) Single-cell RNA sequencing to explore immune cell  
501 heterogeneity. *Nat Rev Immunol* 18(1):35-45.
- 502 22. Enge M, *et al.* (2017) Single-Cell Analysis of Human Pancreas Reveals  
503 Transcriptional Signatures of Aging and Somatic Mutation Patterns. *Cell*  
504 171(2):321-330 e314.
- 505 23. Zheng C, *et al.* (2017) Landscape of Infiltrating T Cells in Liver Cancer Revealed by  
506 Single-Cell Sequencing. *Cell* 169(7):1342-1356 e1316.
- 507 24. Chung W, *et al.* (2017) Single-cell RNA-seq enables comprehensive tumour and  
508 immune cell profiling in primary breast cancer. *Nat Commun* 8:15081.
- 509 25. La Manno G, *et al.* (2016) Molecular Diversity of Midbrain Development in Mouse,  
510 Human, and Stem Cells. *Cell* 167(2):566-580 e519.
- 511 26. Zheng GX, *et al.* (2017) Massively parallel digital transcriptional profiling of single  
512 cells. *Nat Commun* 8:14049.
- 513 27. Morbach H, Eichhorn EM, Liese JG, & Girschick HJ (2010) Reference values for B  
514 cell subpopulations from infancy to adulthood. *Clin Exp Immunol* 162(2):271-279.
- 515 28. Butler A, Hoffman P, Smibert P, Papalexi E, & Satija R (2018) Integrating single-  
516 cell transcriptomic data across different conditions, technologies, and species. *Nat*  
517 *Biotechnol* 36(5):411-420.
- 518 29. Mahnke YD, Brodie TM, Sallusto F, Roederer M, & Lugli E (2013) The who's who of  
519 T-cell differentiation: human memory T-cell subsets. *Eur J Immunol* 43(11):2797-  
520 2809.
- 521 30. Taniuchi I & Ellmeier W (2011) Transcriptional and epigenetic regulation of  
522 CD4/CD8 lineage choice. *Adv Immunol* 110:71-110.
- 523 31. Appay V, *et al.* (2002) Characterization of CD4(+) CTLs ex vivo. *J Immunol*

- 524 168(11):5954-5958.
- 525 32. Tian Y, *et al.* (2017) Unique phenotypes and clonal expansions of human CD4  
526 effector memory T cells re-expressing CD45RA. *Nat Commun* 8(1):1473.
- 527 33. Qiu X, *et al.* (2017) Single-cell mRNA quantification and differential analysis with  
528 Census. *Nat Methods* 14(3):309-315.
- 529 34. Zaunders JJ, *et al.* (2004) Identification of circulating antigen-specific CD4+ T  
530 lymphocytes with a CCR5+, cytotoxic phenotype in an HIV-1 long-term  
531 nonprogressor and in CMV infection. *Blood* 103(6):2238-2247.
- 532 35. Juno JA, *et al.* (2017) Cytotoxic CD4 T Cells-Friend or Foe during Viral Infection?  
533 *Front Immunol* 8:19.
- 534 36. Patil VS, *et al.* (2018) Precursors of human CD4(+) cytotoxic T lymphocytes  
535 identified by single-cell transcriptome analysis. *Sci Immunol* 3(19).
- 536 37. Quezada SA, *et al.* (2010) Tumor-reactive CD4(+) T cells develop cytotoxic activity  
537 and eradicate large established melanoma after transfer into lymphopenic hosts. *J*  
538 *Exp Med* 207(3):637-650.
- 539 38. Xie Y, *et al.* (2010) Naive tumor-specific CD4(+) T cells differentiated in vivo  
540 eradicate established melanoma. *J Exp Med* 207(3):651-667.
- 541 39. Haabeth OA, *et al.* (2014) How Do CD4(+) T Cells Detect and Eliminate Tumor  
542 Cells That Either Lack or Express MHC Class II Molecules? *Front Immunol* 5:174.
- 543 40. Weiskopf D, *et al.* (2015) Dengue virus infection elicits highly polarized CX3CR1+  
544 cytotoxic CD4+ T cells associated with protective immunity. *Proc Natl Acad Sci U S*  
545 *A* 112(31):E4256-4263.
- 546 41. Brown DM, Lee S, Garcia-Hernandez Mde L, & Swain SL (2012) Multifunctional  
547 CD4 cells expressing gamma interferon and perforin mediate protection against  
548 lethal influenza virus infection. *J Virol* 86(12):6792-6803.
- 549 42. Aslan N, *et al.* (2006) Cytotoxic CD4 T cells in viral hepatitis. *J Viral Hepat*  
550 13(8):505-514.
- 551 43. van Leeuwen EM, *et al.* (2004) Emergence of a CD4+CD28- granzyme B+,  
552 cytomegalovirus-specific T cell subset after recovery of primary cytomegalovirus  
553 infection. *J Immunol* 173(3):1834-1841.
- 554 44. Jellison ER, Kim SK, & Welsh RM (2005) Cutting edge: MHC class II-restricted  
555 killing in vivo during viral infection. *J Immunol* 174(2):614-618.
- 556 45. Takeuchi A, *et al.* (2016) CRTAM determines the CD4+ cytotoxic T lymphocyte  
557 lineage. *J Exp Med* 213(1):123-138.
- 558 46. Mucida D, *et al.* (2013) Transcriptional reprogramming of mature CD4(+) helper T  
559 cells generates distinct MHC class II-restricted cytotoxic T lymphocytes. *Nat*

560            *Immunol* 14(3):281-289.  
561    47.    Dobin A, *et al.* (2013) STAR: ultrafast universal RNA-seq aligner. *Bioinformatics*  
562            29(1):15-21.  
563  
564  
565

566 **Acknowledgements**

567 We would like to thank all the donors who participated in this study. We also thank RIKEN  
568 GeNAS for the sequencing of the single-cell libraries. This work was supported by a Research  
569 Grant from the Japanese Ministry of Education, Culture, Sports, Science and Technology (MEXT)  
570 to the RIKEN Center for Integrative Medical Sciences and Research Grants for Keio University  
571 Global Initiative Research Projects.

572

573 **Author contributions**

574 KH, MV, GP, and PC contributed bioinformatics analyses and interpretation of data. TK, NH, HY,  
575 TT, YO, JWS, and AM contributed experiments and data production of the single-cell  
576 transcriptome. TI, YM, TS, HS, and IT contributed FACS analysis and interpretation. TS, HO,  
577 YA, and NH contributed recruitment of supercentenarians and management of human ethics  
578 samples. KH, TS, GP, AM, IT, YA, NH, and PC contributed to planning the study. NH and PC  
579 supervised the project.

580

581 **Competing interests**

582 The authors declare no competing interests.

583



584 **Figure legends**

585 **Figure 1.** Single-cell transcriptome profiling of PBMCs of supercentenarians and controls. **a.**

586 Schematic representation of single-cell transcriptome experiments, from blood sample collection

587 to visualization. **b.** The number of recovered cells that passed quality control, and the median

588 number of genes per cell for each of the donors (seven supercentenarians, SC1–SC7; and five

589 controls, CT1–CT5). **c.** Two-dimensional tSNE visualization of 61,202 PBMCs. Different colors

590 in the main map represent ten clusters (cell types) defined by the k-means clustering algorithm.

591 Different colors in the enlarged view represent the 12 donors, separated into supercentenarians

592 (left) and controls (right). **d.** Expression of marker genes for six major cell types; cell positions

593 are from the tSNE plot in **c.**

594

595 **Figure 2.** Significant reduction of B cells in supercentenarians. **a.** Boxplots of the percentage of

596 each cell type (defined by single-cell RNA-Seq) in PBMCs of seven supercentenarians (SC1–

597 SC7) and five controls (CT1–CT5)—the boxes extend from the 25th to 75th percentile and

598 encompass the median (horizontal line). BC, B cell; TC, T cell; NK, natural killer cell; M14,

599 CD14+ monocyte. \*,  $P < 0.05$  (Wilcoxon rank sum test); no asterisk means not significant. **b.**

600 Representative FACS plots showing CD19+ B-cells; the plots for other donors are shown in Fig.

601 S2b. **c.** Boxplots of the percentage of each cell type (defined by FACS) in PBMCs of four

602 supercentenarians SC1–SC4 and three controls CT1–CT3. **d.** Two-dimensional tSNE  
603 visualization of B cells from all 12 donors. Different colors represent the three clusters defined  
604 by the k-means clustering algorithm. **e.** Expression of the indicated markers for B-cell subtypes;  
605 cell positions are from the tSNE plot in **d.** **f.** Boxplots of the percentage of each B-cell subtype  
606 (defined by k-means clustering) in PBMCs of seven supercentenarians (SC1–SC7) and five  
607 controls (CT1–CT5). \*,  $P < 0.05$  (Wilcoxon rank sum test); no asterisk means not significant.

608

609 **Figure 3.** Expansion of cytotoxic T-cells in supercentenarians. **a.** Boxplots of percentages of TC1  
610 and TC2 T-cells (defined by k-means clustering of single cell RNA-Seq data) in PBMCs of seven  
611 supercentenarians (SC1–SC7) and five controls (CT1–CT5). \*,  $P < 0.05$  (Wilcoxon rank sum test).  
612 **b.** Two-dimensional tSNE visualization of T cells using the Seurat R package. Different colors  
613 represent two clusters (Seurat\_TC1 and Seurat\_TC2), similar to the original TC1 and TC2 clusters.  
614 Right panels (top and bottom) show supercentenarians and controls, respectively. **c.** Top 20 genes  
615 significantly highly expressed in Seurat\_TC2 (left) and Seurat\_TC1 (right). Major cytotoxic  
616 effector genes and lymph node homing markers are shown in red. **d.** Expression of cytotoxic  
617 genes in supercentenarians (upper panels) and controls (lower panels); cell positions are from the  
618 tSNE plot in **b.** **e.** Number of detected genes out of four cytotoxic genes (*GZMH*, *GZMB*, *GZMA*,  
619 and *PRF1*) per cell. **f.** Percentage of cytotoxic T-cells (cells clustered in TC2) among the total T-

620 cells.

621

622 **Figure 4.** Expansion of cytotoxic CD4 T-cells in supercentenarians. **a.** Classification of cytotoxic  
623 T-cells into three subtypes—CD4 CTLs, CD8 CTLs, and  $\gamma\delta$  T-cells—was based on the expression  
624 of *CD4*, *CD8*, and *TRDC* (see also Fig. S4a) in T-cells of seven supercentenarians (SC1–SC7)  
625 and five controls (CT1–CT5); cell positions are from the tSNE plot in Fig. 3b. **b.** Percentages of  
626 CD4 CTLs and  $\gamma\delta$  T-cells among the total T-cells. **c.** Percentages of CD4+ T-cells and CD8+ T-  
627 cells in total T-cells. **d.** FACS profiles of six supercentenarians (SC1, SC5–7, and SC9) and one  
628 semi-supercentenarian (SC8). Cells gated on CD3+ were profiled using CD4 (x-axis) and GZMB  
629 (y-axis). Cells in upper right corners are CD4 CTLs. **e.** Percentages of CD4+ GZMB+ cells among  
630 the total T-cells of the six supercentenarians and one semi-supercentenarian listed in **d** and five  
631 controls (CT4, CT5, and CT6–CT8). **f.** Correlation between percentage of CD4 CTLs determined  
632 by RNA-Seq and FACS measurements. Each dot represents one donor, shown in green for  
633 supercentenarians (SC1, SC5–SC7) and red for controls (CT4, CT5).

634

635 **Figure 5.** The differentiation state of T cells for seven supercentenarians (SC1–SC7) and five  
636 controls (CT1–CT5). **a.** Pseudotime trajectory of T cells estimated using Monocle 2. A continuous  
637 value from 0 to 12 was assigned to each cell as a pseudotime. The lower panel shows the general

638 scheme of T-cell differentiation. TN, naïve; TCM, central memory; TEM, effector memory; and  
639 TEMRA, effector memory re-expressing CD45RA. **b.** Expression transition of differentiation-  
640 associated genes along the pseudotime. **c.** Percentages of T cells along the pseudotime for  
641 supercentenarians (SC) and controls (CT). **d.** Percentages of CD4 and CD8 CTLs among the total  
642 T-cells along the pseudotime. **e.** Correlation of gene expression between CD4 and CD8 CTLs. **f.**  
643 Expression transition of selected genes shown separately for CD4 and CD8 CTLs.

644

645 **Figure 6.** Single-cell transcriptome and TCR profiles of CD4+ T-cells for two supercentenarians  
646 (SC1, upper panels; and SC2, lower panels). **a.** Schematic representation of experiments for the  
647 single-cell transcriptome and TCR analysis. **b.** Two-dimensional tSNE visualization of three cell  
648 types (TC, T-cell; NK, natural killer cell; EC, erythroid cell), and CD3D expression (right). **c.**  
649 Expression of marker genes for CD4 and CD8 T-cells; cell positions are from the tSNE plot in **b.**  
650 **d.** T cells recovered in both transcriptome and TCR libraries. Recovered cells were clustered into  
651 helper T-cells and CD4 CTLs, shown in the tSNE plot. **e.** Expression of a marker gene for  
652 cytotoxic T-cells; cell positions are from the tSNE plot in **d.** **f.** Diversity of TCRs in helper T-cells  
653 and CD4 CTLs. **g.** Cumulative occupancy of the top 50 most abundant clonotypes. **h.** Occupancy  
654 of the top 10 most abundant clonotypes. **i.** Pseudotime and cytotoxicity of clonally expanded CD4  
655 T-cells. Cytotoxicity values indicate the mean expression of five cytotoxic genes: *NKG7*, *GZMA*,

656 *GZMB*, *GZMH*, and *PRF1*.

657

658 **Figure S1.** Single-cell transcriptome profile of PBMCs. **a.** Samples used for single-cell RNA-Seq  
659 and FACS analyses. FACS1 used antibodies against major cell-type markers: CD3, CD19, CD14,  
660 CD16, and NCAM1 (CD56), whereas FACS2 used antibodies against T-cell subtype markers:  
661 CD3, CD4, CD8, and *GZMB*. **b.** Median numbers of UMI counts per cell for each donor **c.** Two-  
662 dimensional tSNE visualization of 61,202 PBMCs. Different colors represent twelve donors. **d.**  
663 Expression of marker genes for cell-type markers and *MALAT1* as the highest expressed gene;  
664 cell positions are from the tSNE plots in Fig. 1c. **e.** Expression of marker genes used to define  
665 three small clusters by k-means clustering (i.e., MKI67+ proliferating cells [MKI], dendritic cells  
666 [DC], and megakaryocytes [MGK]).

667

668 **Figure S2.** Reduction in the number of B cells in supercentenarians. **a.** Boxplots of the percentage  
669 of each indicated cell type in PBMCs. **b.** FACS plots for four supercentenarians (SC1–SC4) and  
670 three controls (CT1–CT3) profiled using CD3, CD19, NCAM1 (CD56), CD14, and FCGR3A  
671 (CD16). **c.** Two-dimensional tSNE visualization of B cells shown separately for supercentenarians  
672 (SC) and controls (CT). **d.** Expression of markers for B-cell subtypes; cell positions are from the  
673 tSNE plot in Fig. 2d. **e.** Expression of immunoglobulin heavy chains in each B-cell subtype. Upper

674 panel shows total expression of IGHM and IGHD, which are used before the class switch. Lower  
675 panel shows total expression of IGHA1, IGHA2, IGHG1, IGHG2, IGHG3, and IGHG4, which  
676 are used after the class switch.

677

678 **Figure S3.** Expansion of cytotoxic T-cell populations in supercentenarians. **a.** Two-dimensional  
679 tSNE visualization of T cells using the Seurat R package. Different colors represent the original  
680 TC1 and TC2 clusters; 86.3% of the original TC1 is clustered into Seurat\_TC1; 97.6% of the  
681 original TC2 is clustered into Seurat\_TC2. **b–d.** Expression of cytotoxic genes and lymph node  
682 homing markers; cell positions are from the tSNE plot in **a.**

683

684 **Figure S4.** Expansion of cytotoxic CD4 T-cell populations in supercentenarians. **a.** CD8 CTLs  
685 defined based on the expression of *CD8A* and *CD8B*; cell positions are from the tSNE plot in Fig.  
686 4a. **b.** Percentages of CD8 T-cells among the total T-cells. **c.** FACS profiles of supercentenarians  
687 (SC1, SC5–SC7, SC9, and SC10) and one semi-supercentenarian (SC8), and controls (CT4–CT8).  
688 Cells gated on CD3+ were profiled using CD4 (x-axis) and CD8 (y-axis). Cells in lower right and  
689 upper left corners are classified as CD4 and CD8 T-cells, respectively. **d.** FACS profiles of five  
690 controls (CT4–CT8). Cells gated on CD3+ were profiled using CD4 (x-axis) and GZMB (y-axis).  
691 **e.** Ratio between the percentage of GZMB+ and GZMB– cells in CD4 (x-axis) and CD8 (y-axis)

692 T-cells. Ratio “1:1” indicates that the percentage of GZMB+ cells equals that of GZMB– cells.

693

694 **Figure S5.** The differentiation state of T cells in supercentenarians. **a.** Pseudotime trajectory of T

695 cells, shown separately for supercentenarians (SC) and controls (CT). **b.** Pseudotime trajectory of

696 T cells colored by TC1 and TC2. **c.** Expression transition of differentiation-associated genes. **d.**

697 Expression of *FOXP3* and *IL2RA* (CD25) mapped in pseudotime. **e.** Expression transition of

698 *FOXP3* and *IL2RA* (CD25) along the pseudotime. **f.** Distribution of CD4 and CD8 CTLs mapped

699 in pseudotime. **g.** Expression transition of selected genes shown separately for CD4 and CD8

700 CTLs.

701

702 **Figure S6.** Single-cell 5' transcriptome and TCR profiles for two supercentenarians (SC1, upper

703 panels and SC2, lower panels). **a.** Expression of a marker gene for T-cells. **b.** Expression of marker

704 genes for B-cells (*MS4A1*), erythrocytes (*HBA1*), NK cells (*KLRF1*), and monocytes (*CD14*). **c.**

705 Expression of marker genes for CD4 T-cells (*CD40LG*) and CD8 T-cells (*CD8B*). **d.** Presence or

706 absence of cells in TCR libraries. **e.** Expression of marker genes for cytotoxic T-cells. **f.**

707 Expression of marker genes for T-cell differentiation. **g.** Distribution of the top 2 most abundant

708 clonotypes, CD01 and CT02, on the t-SNE map. **h.** Diversity of TCRs in publicly available

709 datasets released by another group. **i.** Transient expression of genes associated with T-cell

710 differentiation.

711



# Figure 1

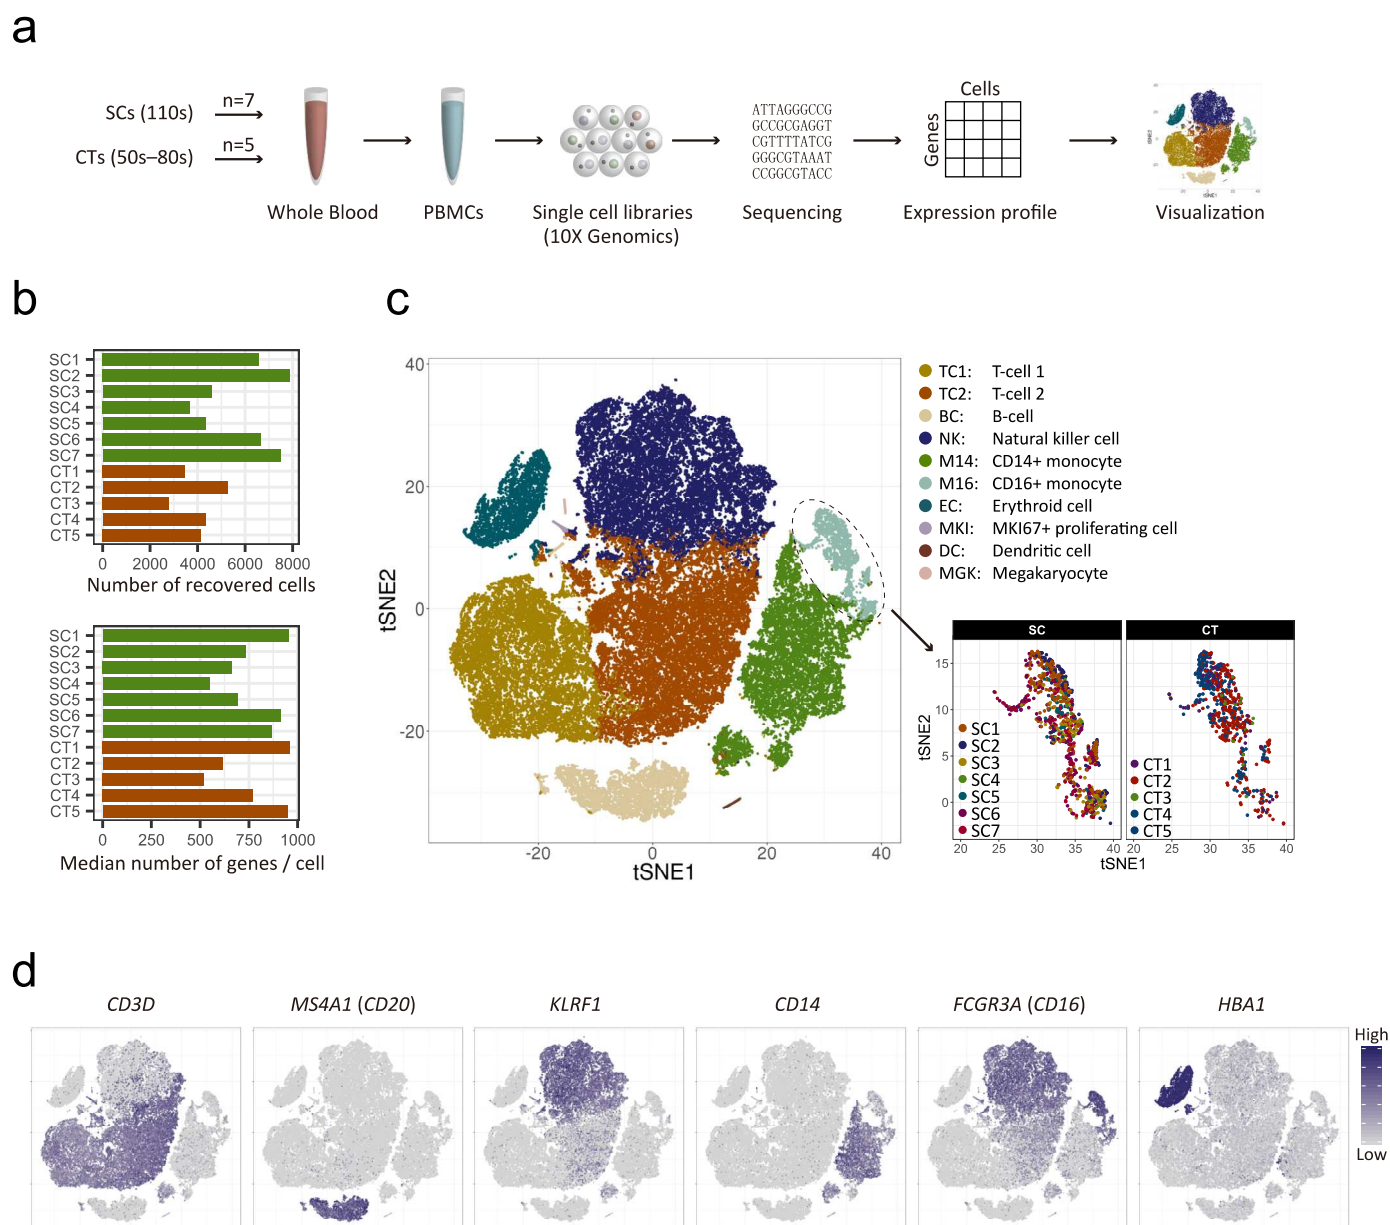

## Figure 2

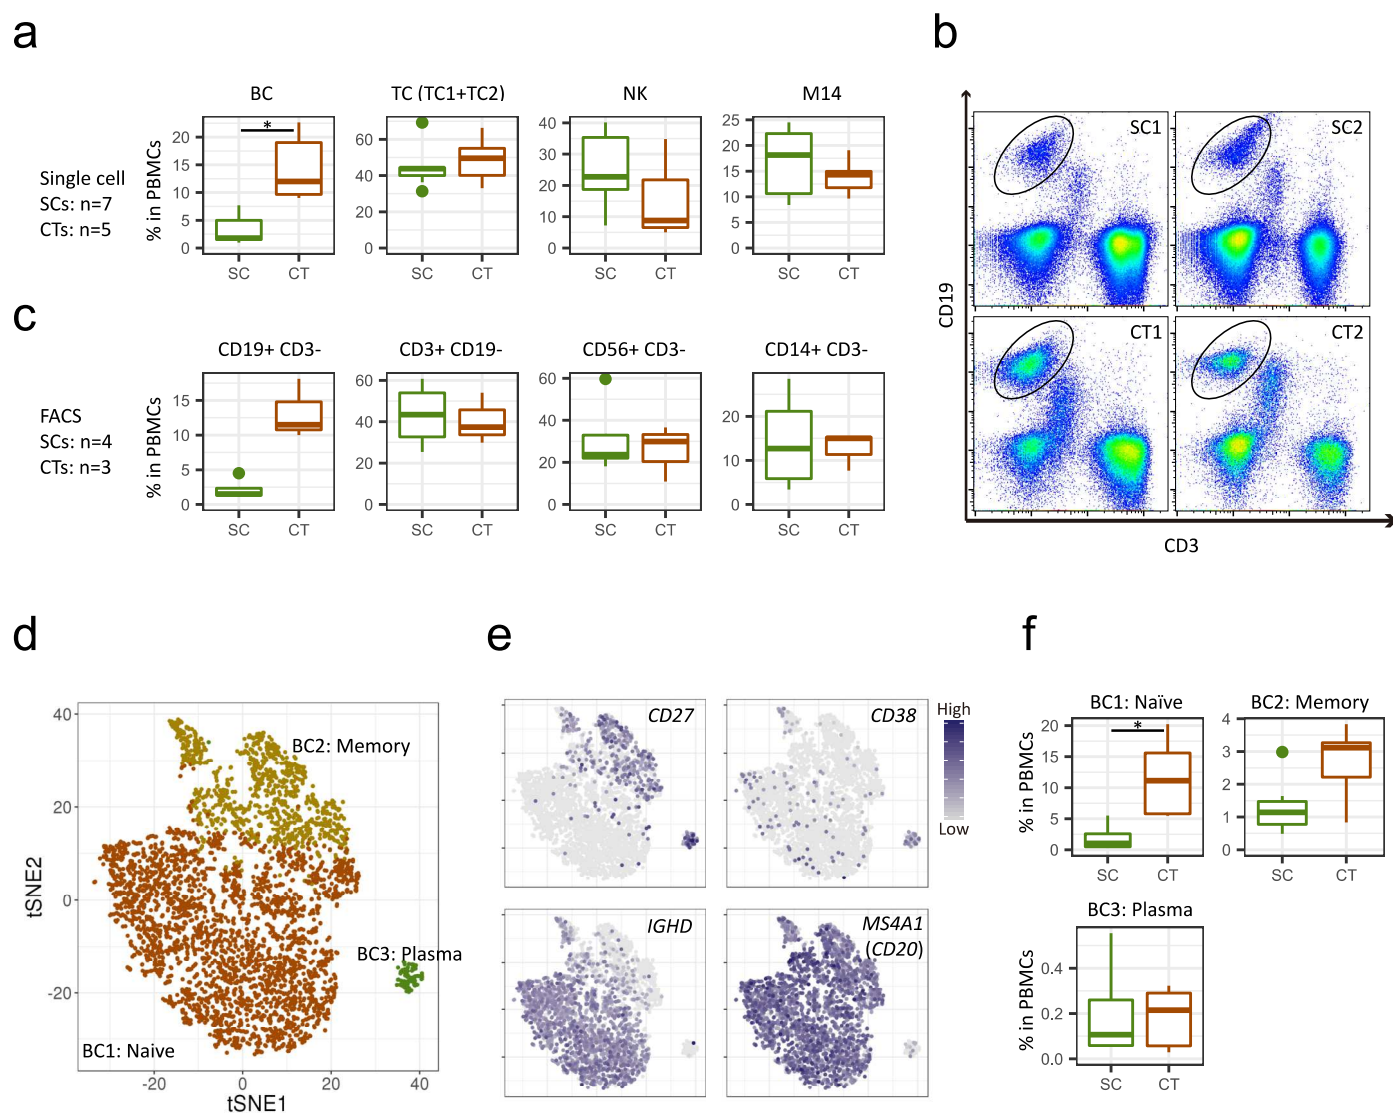

# Figure 3

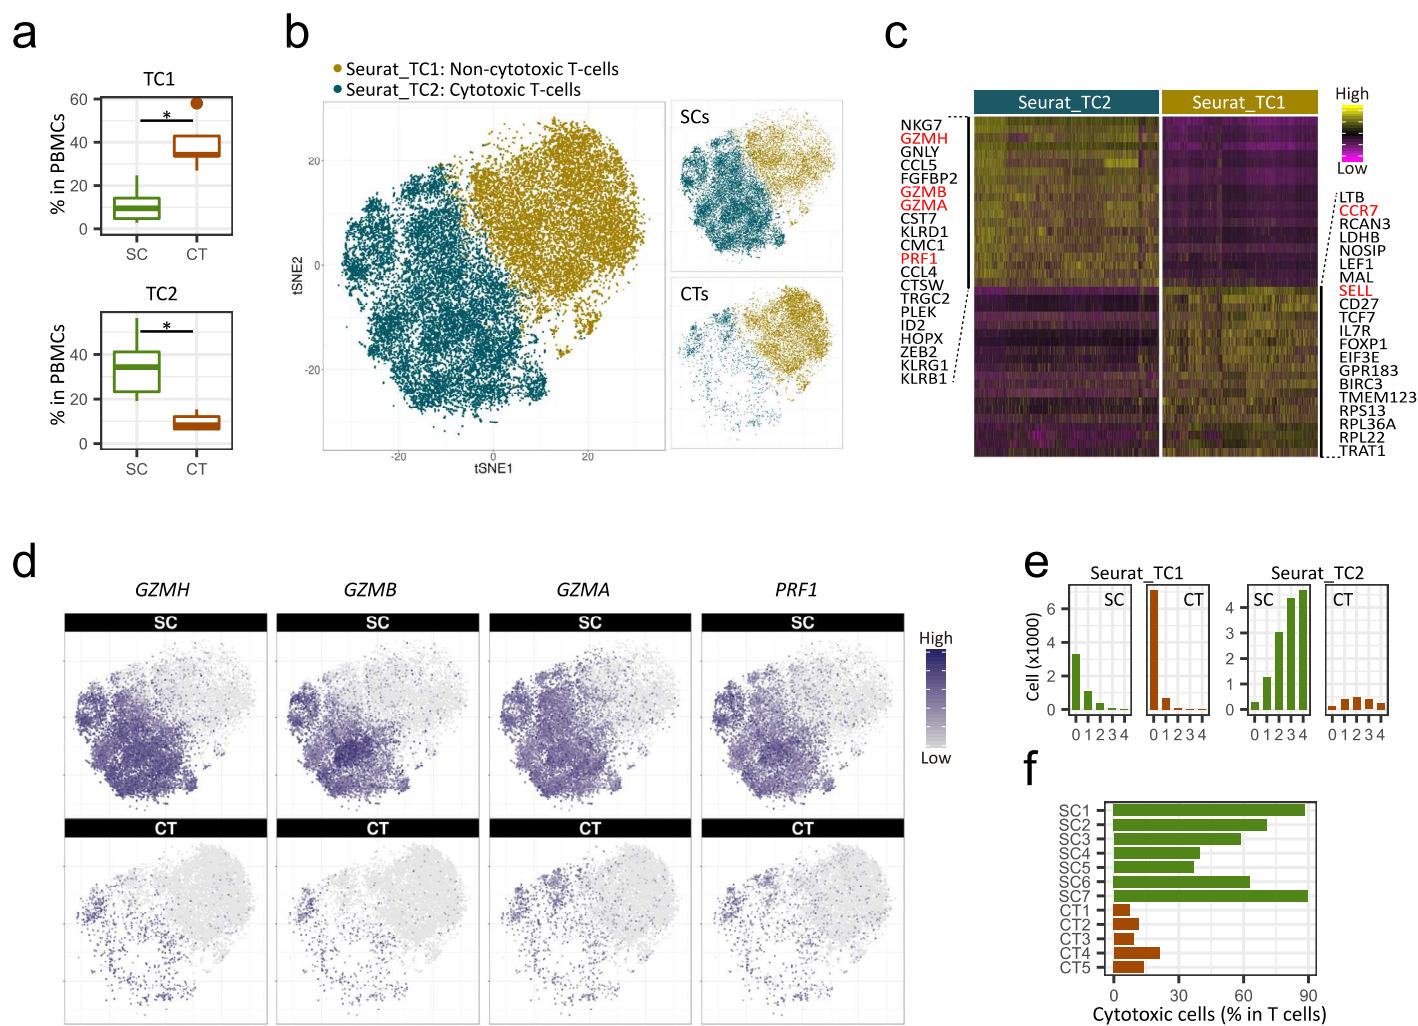

## Figure 4

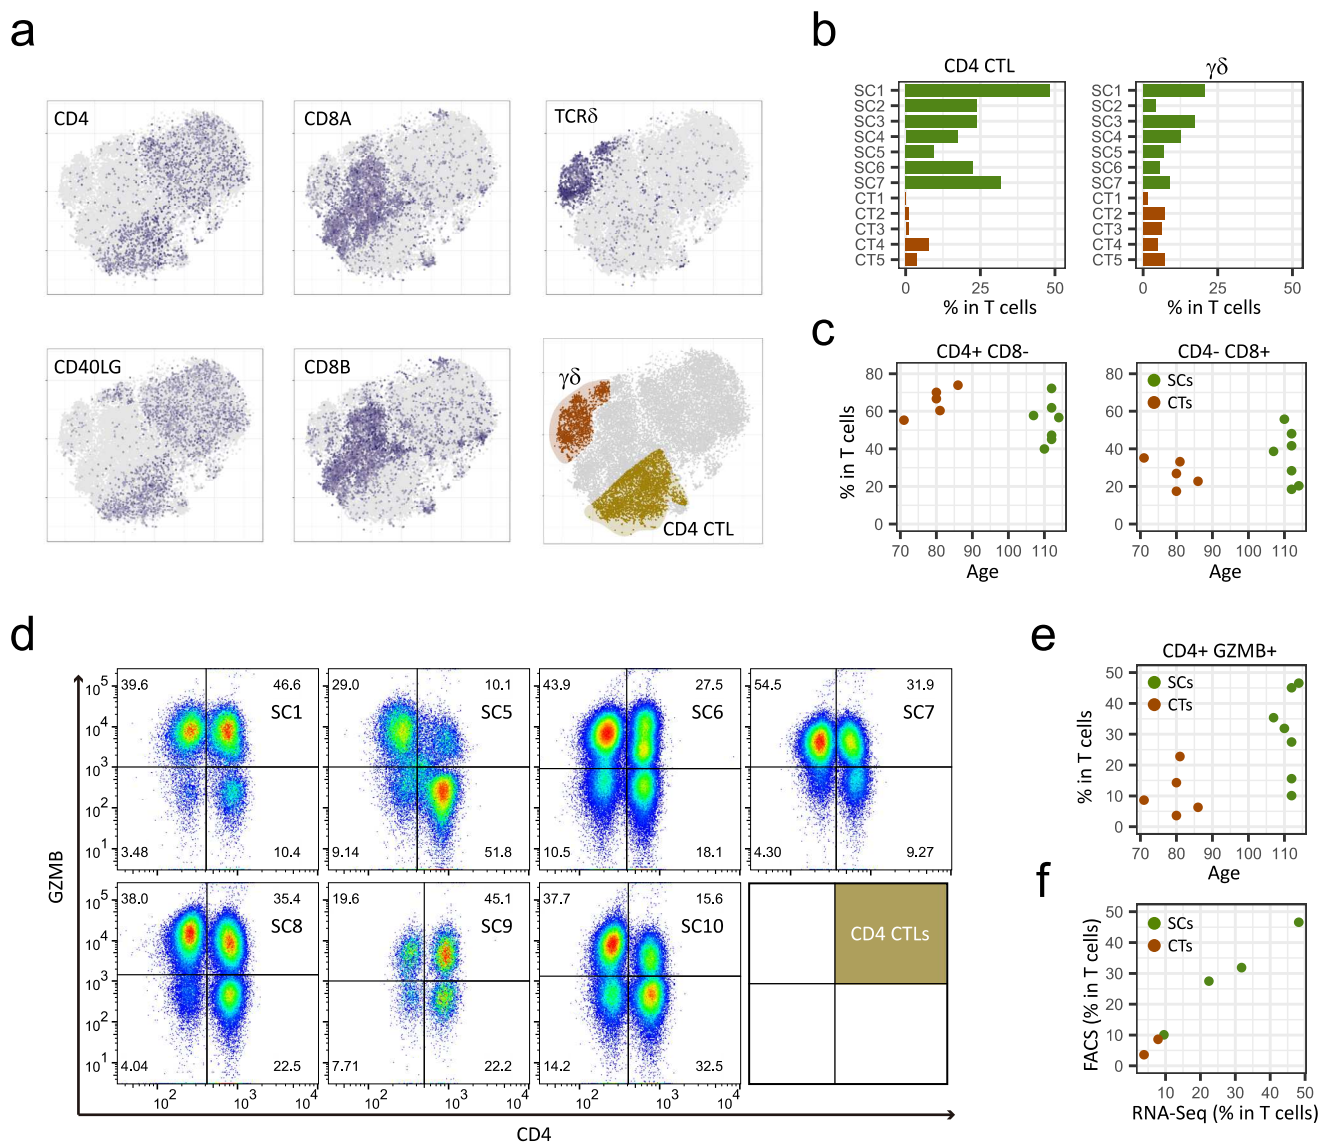

## Figure 5

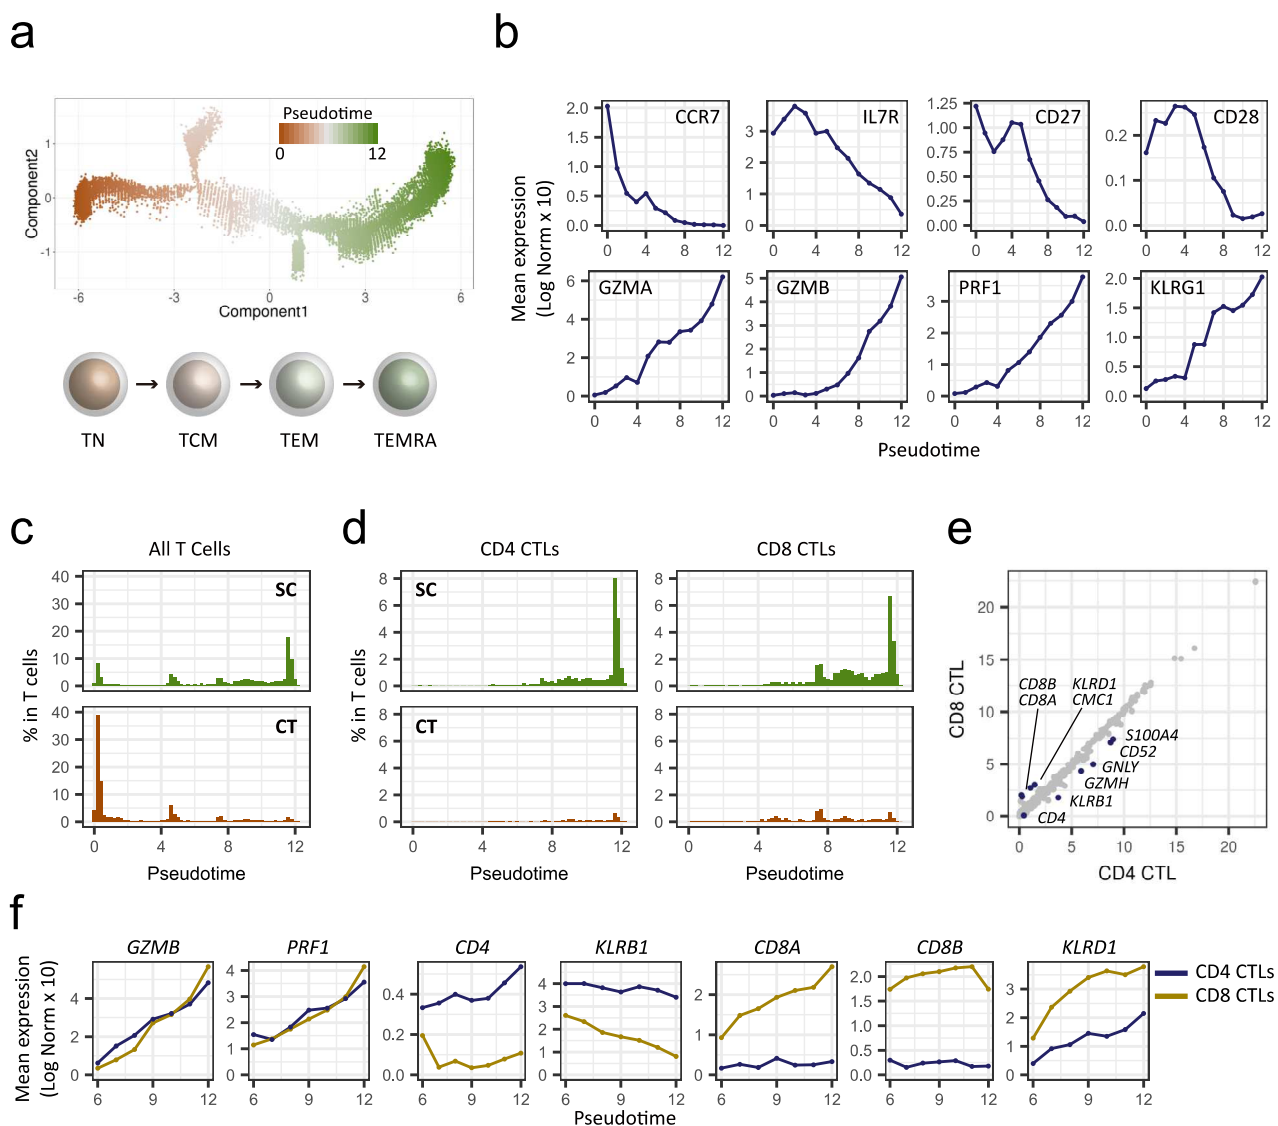

## Figure 6

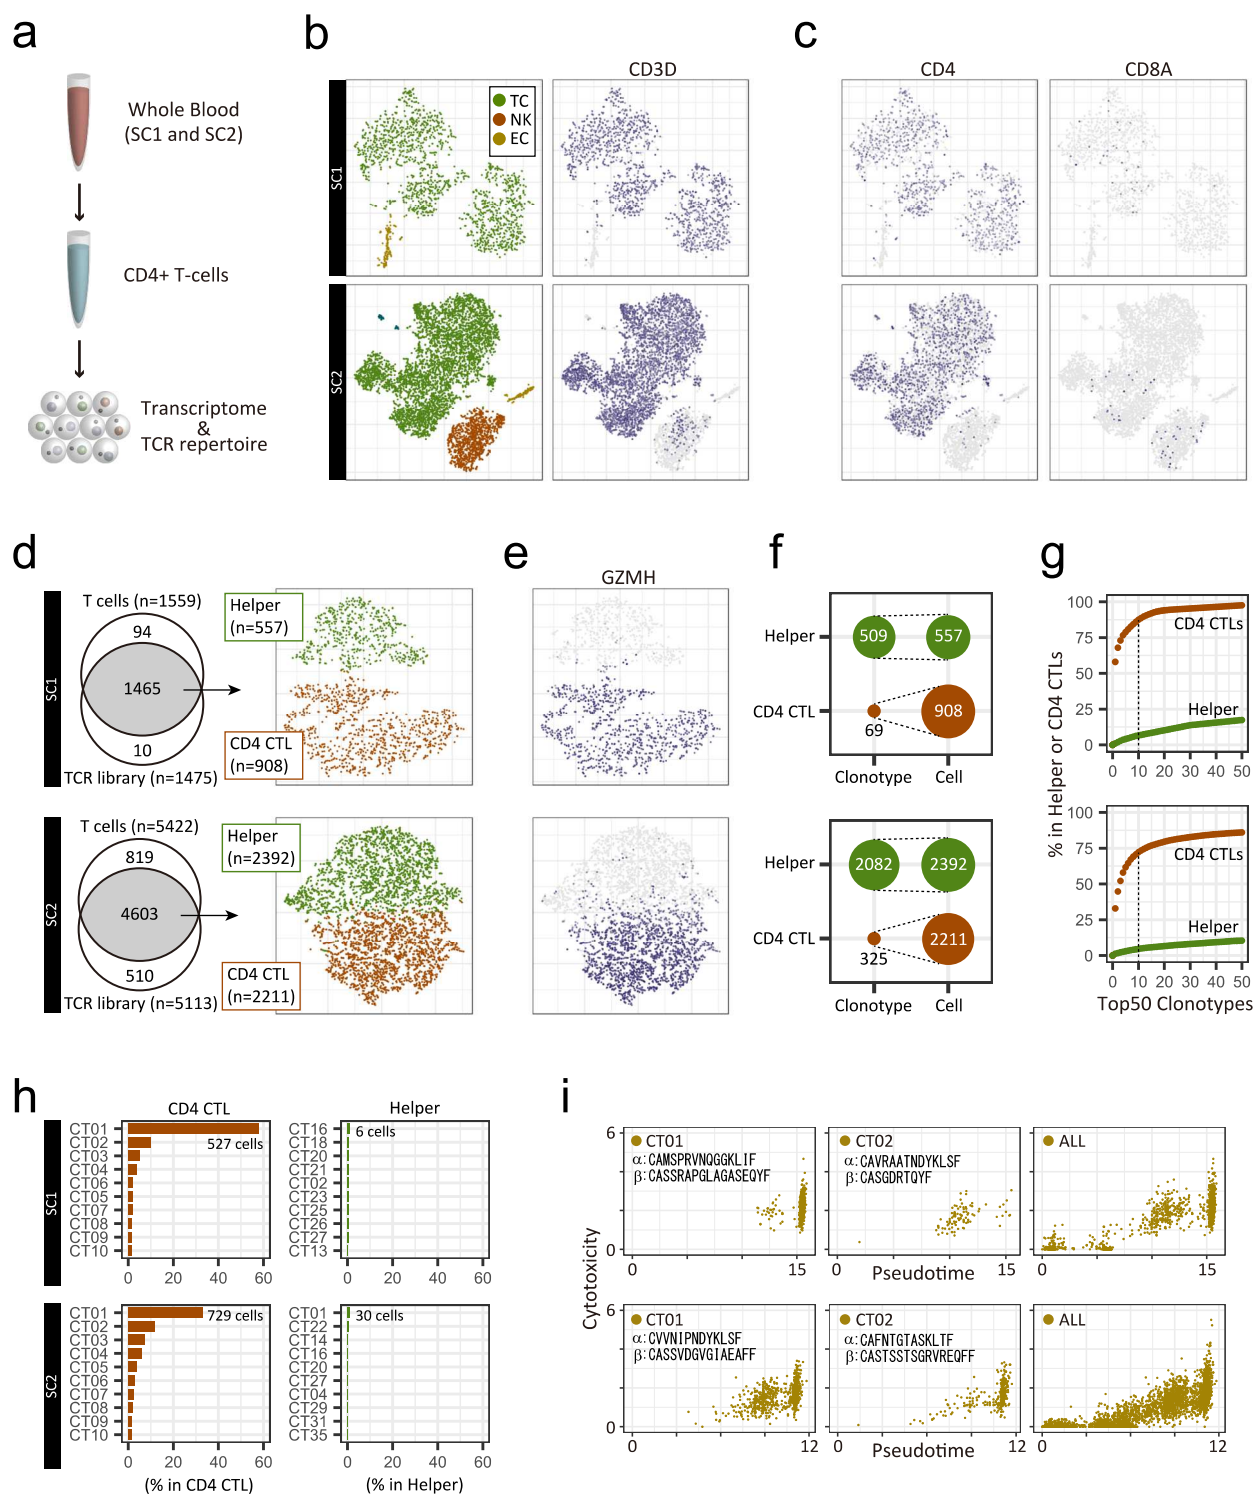

# Figure S1

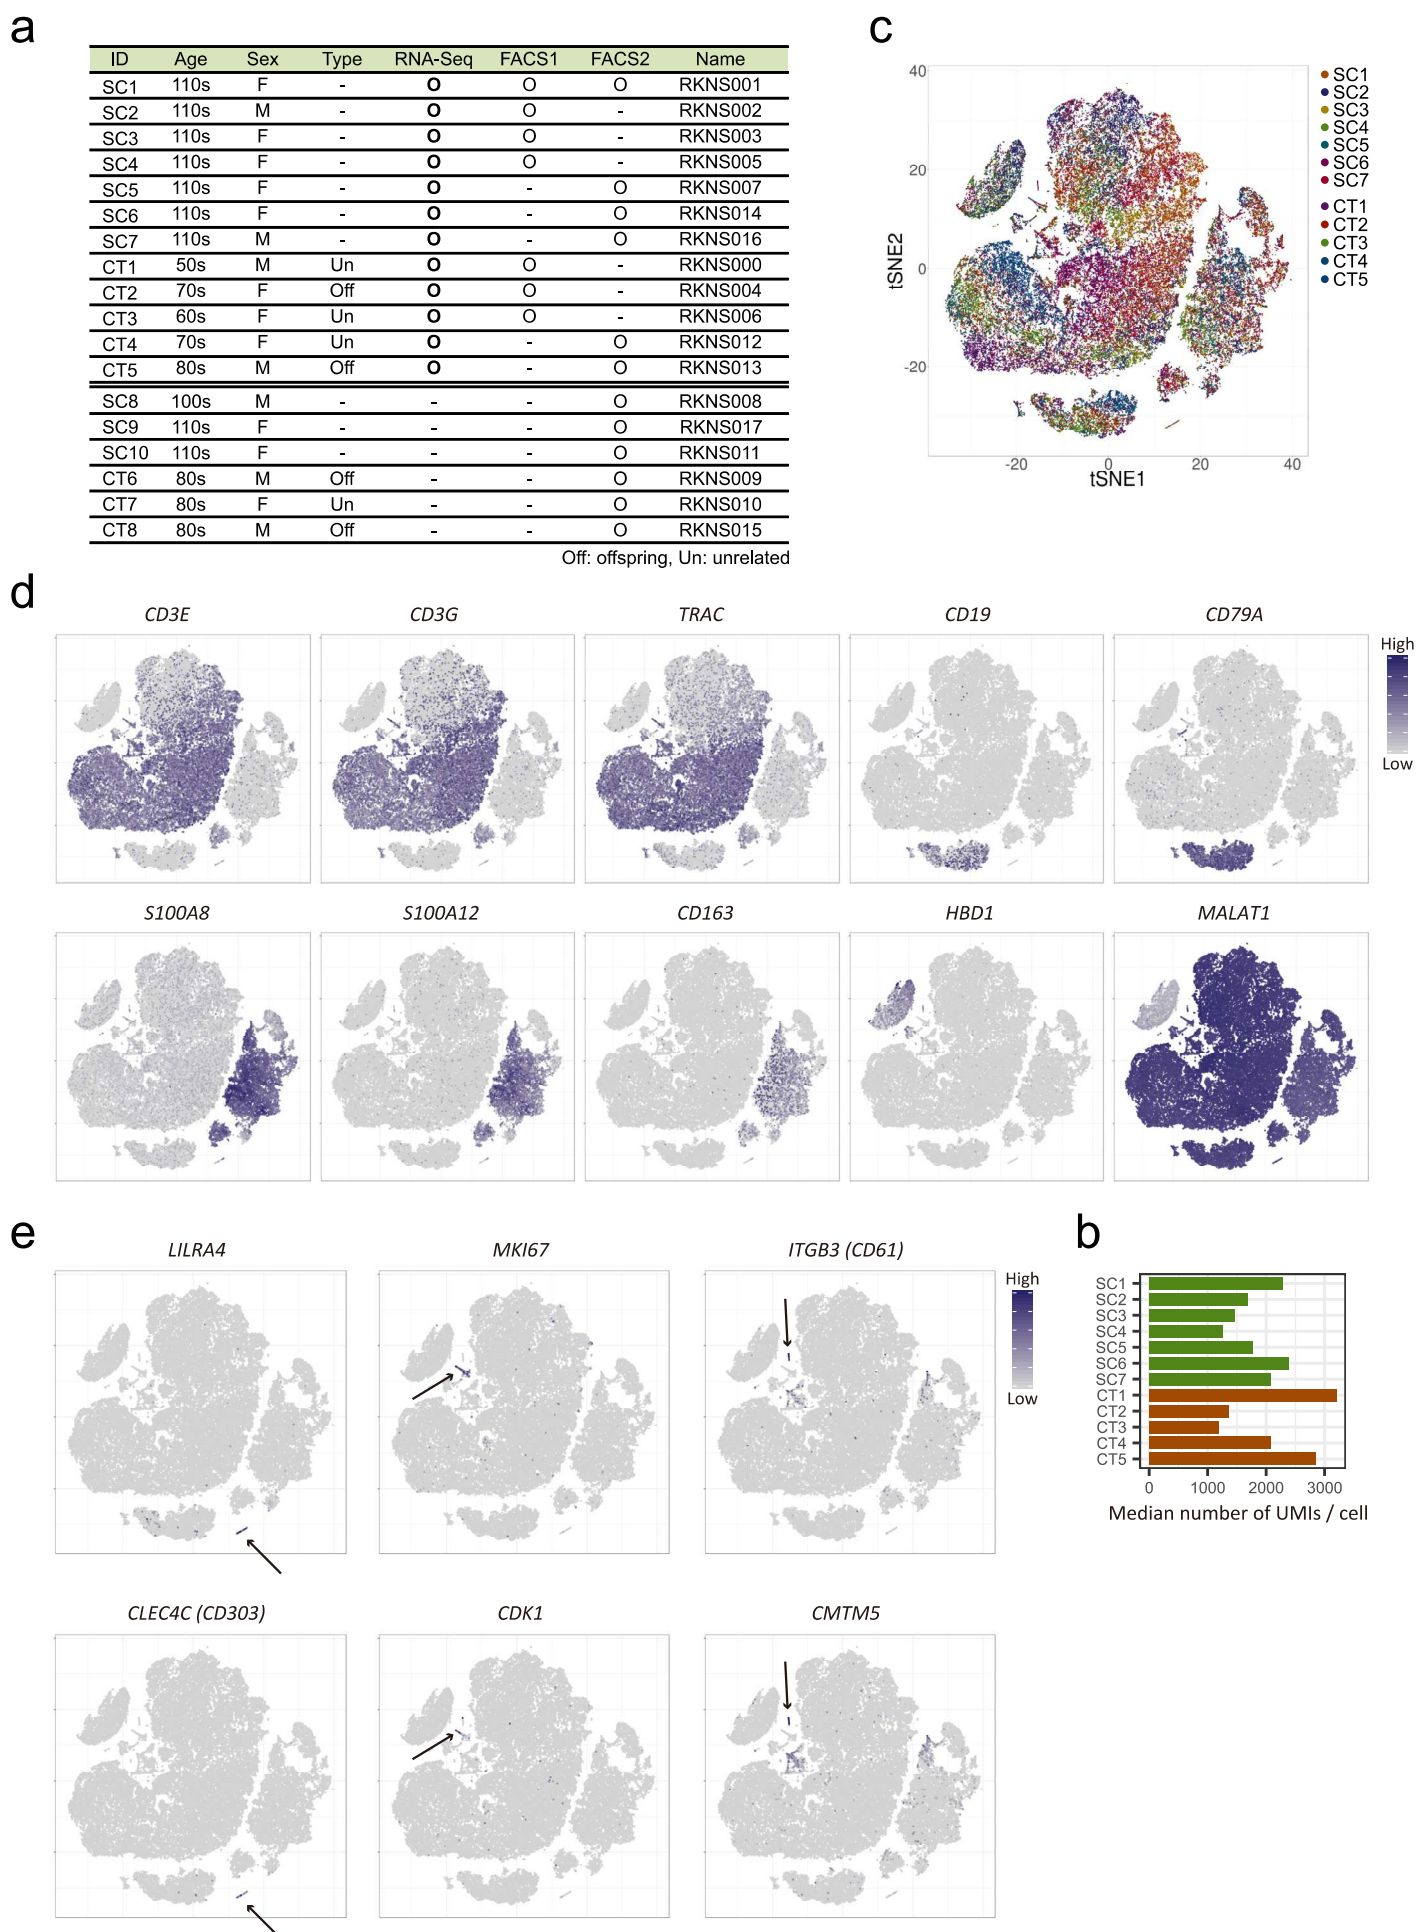

## Figure S2

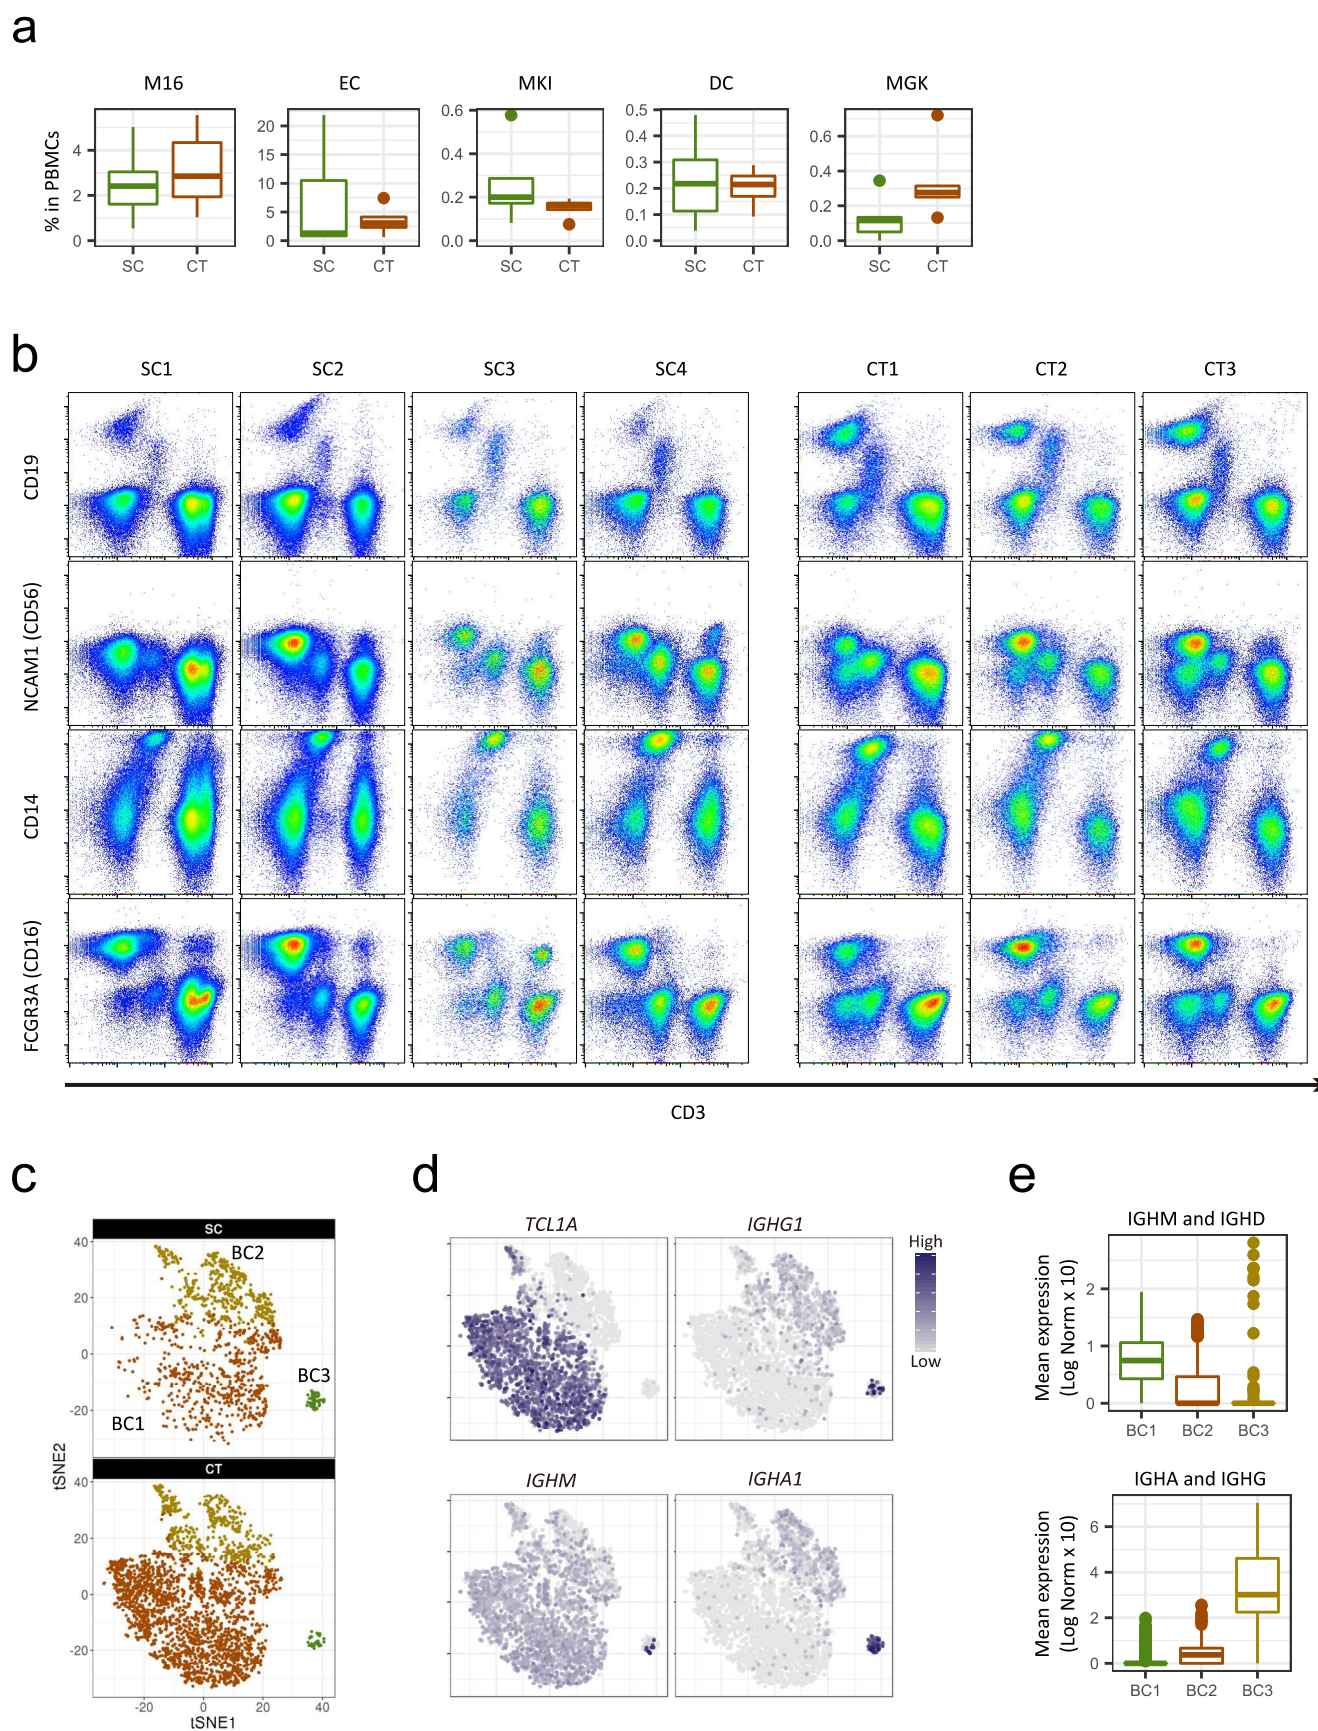



## Figure S3

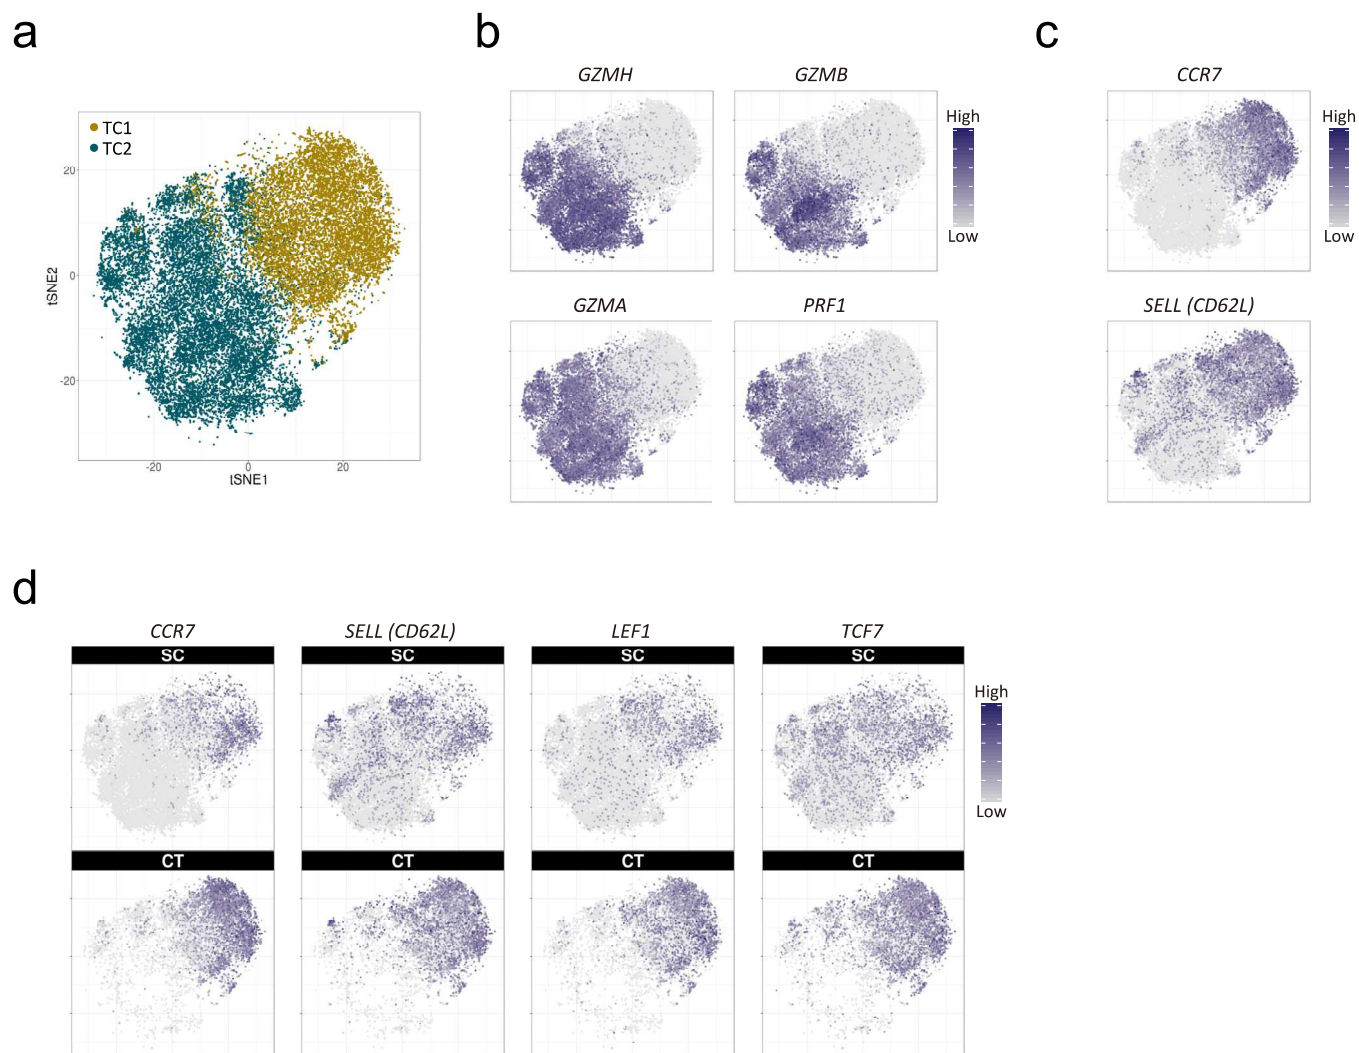

# Figure S4

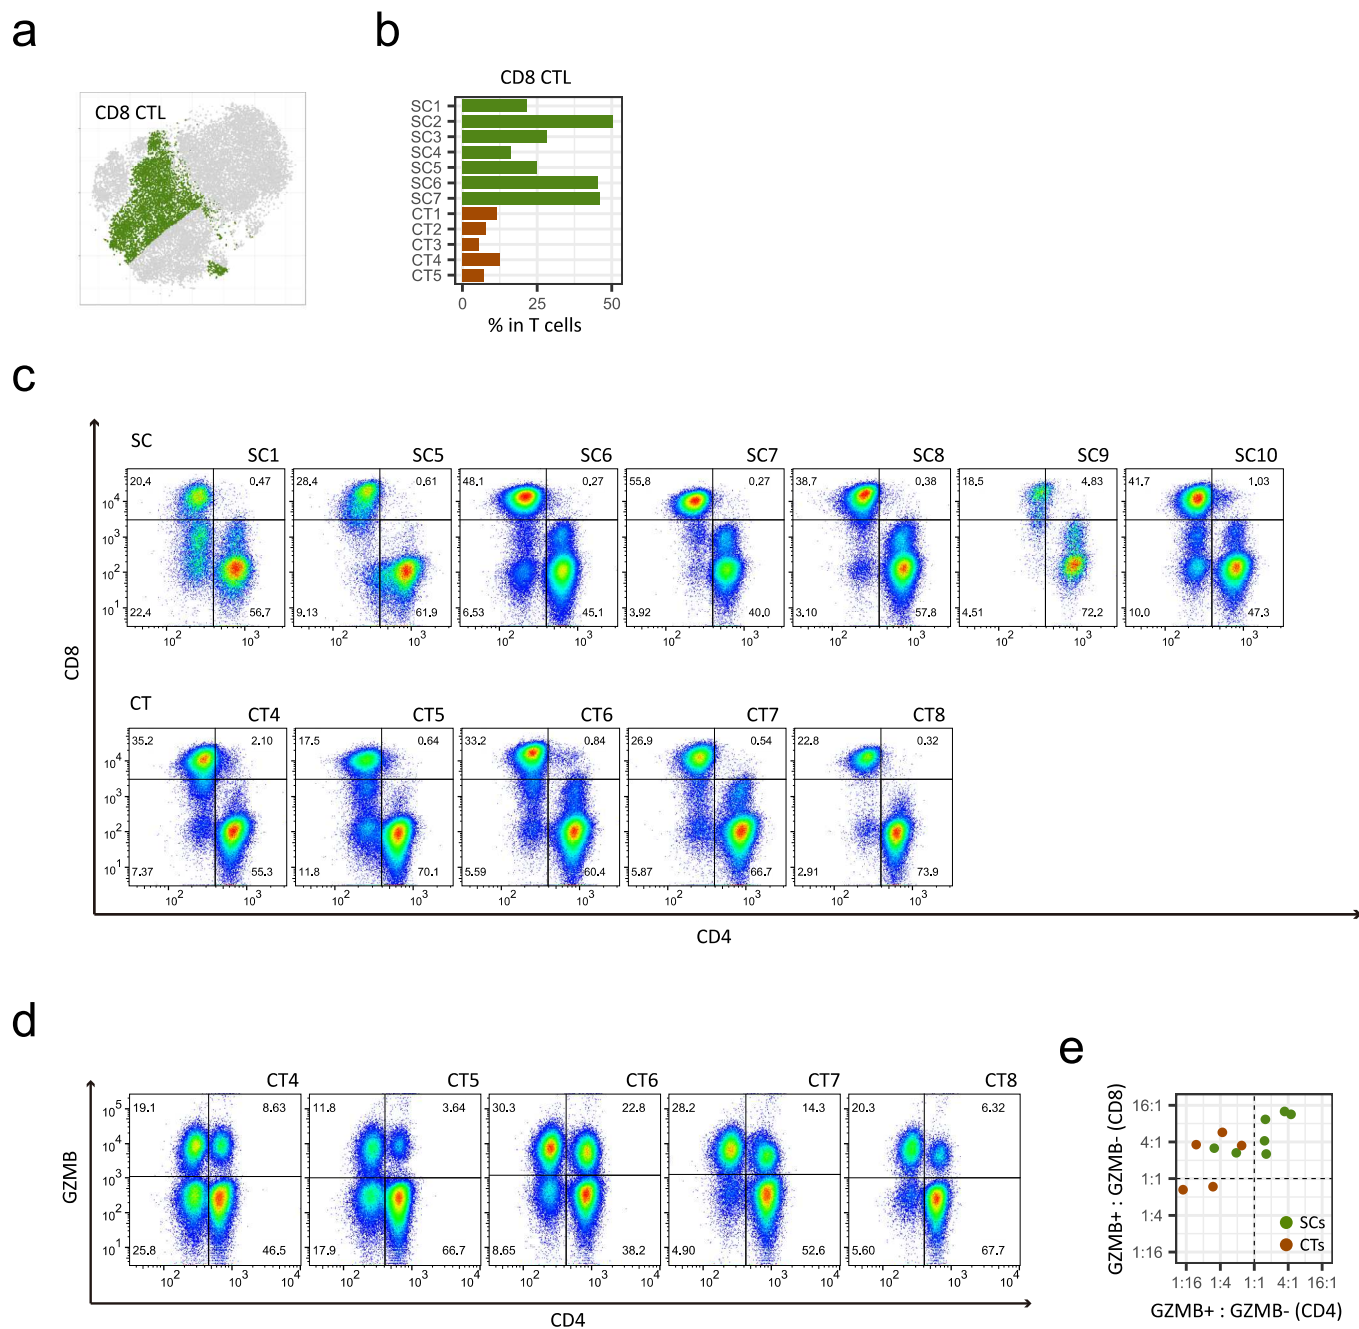

# Figure S5

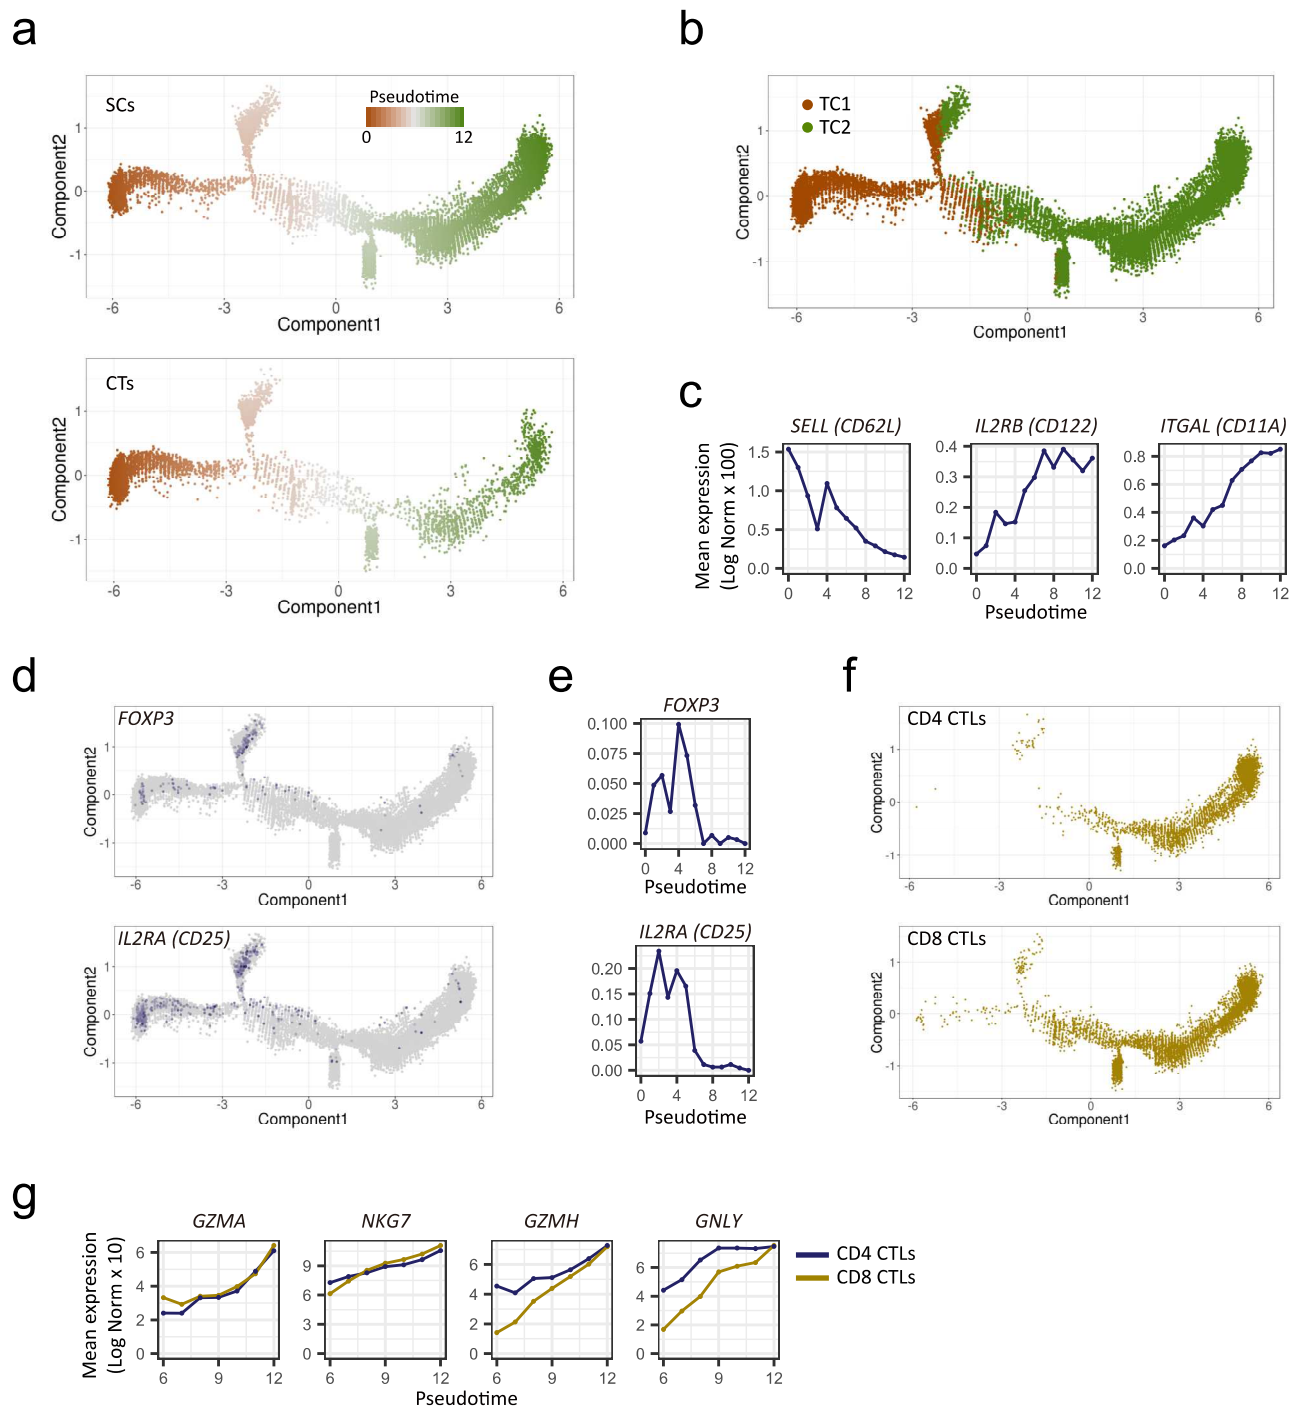

# Figure S6

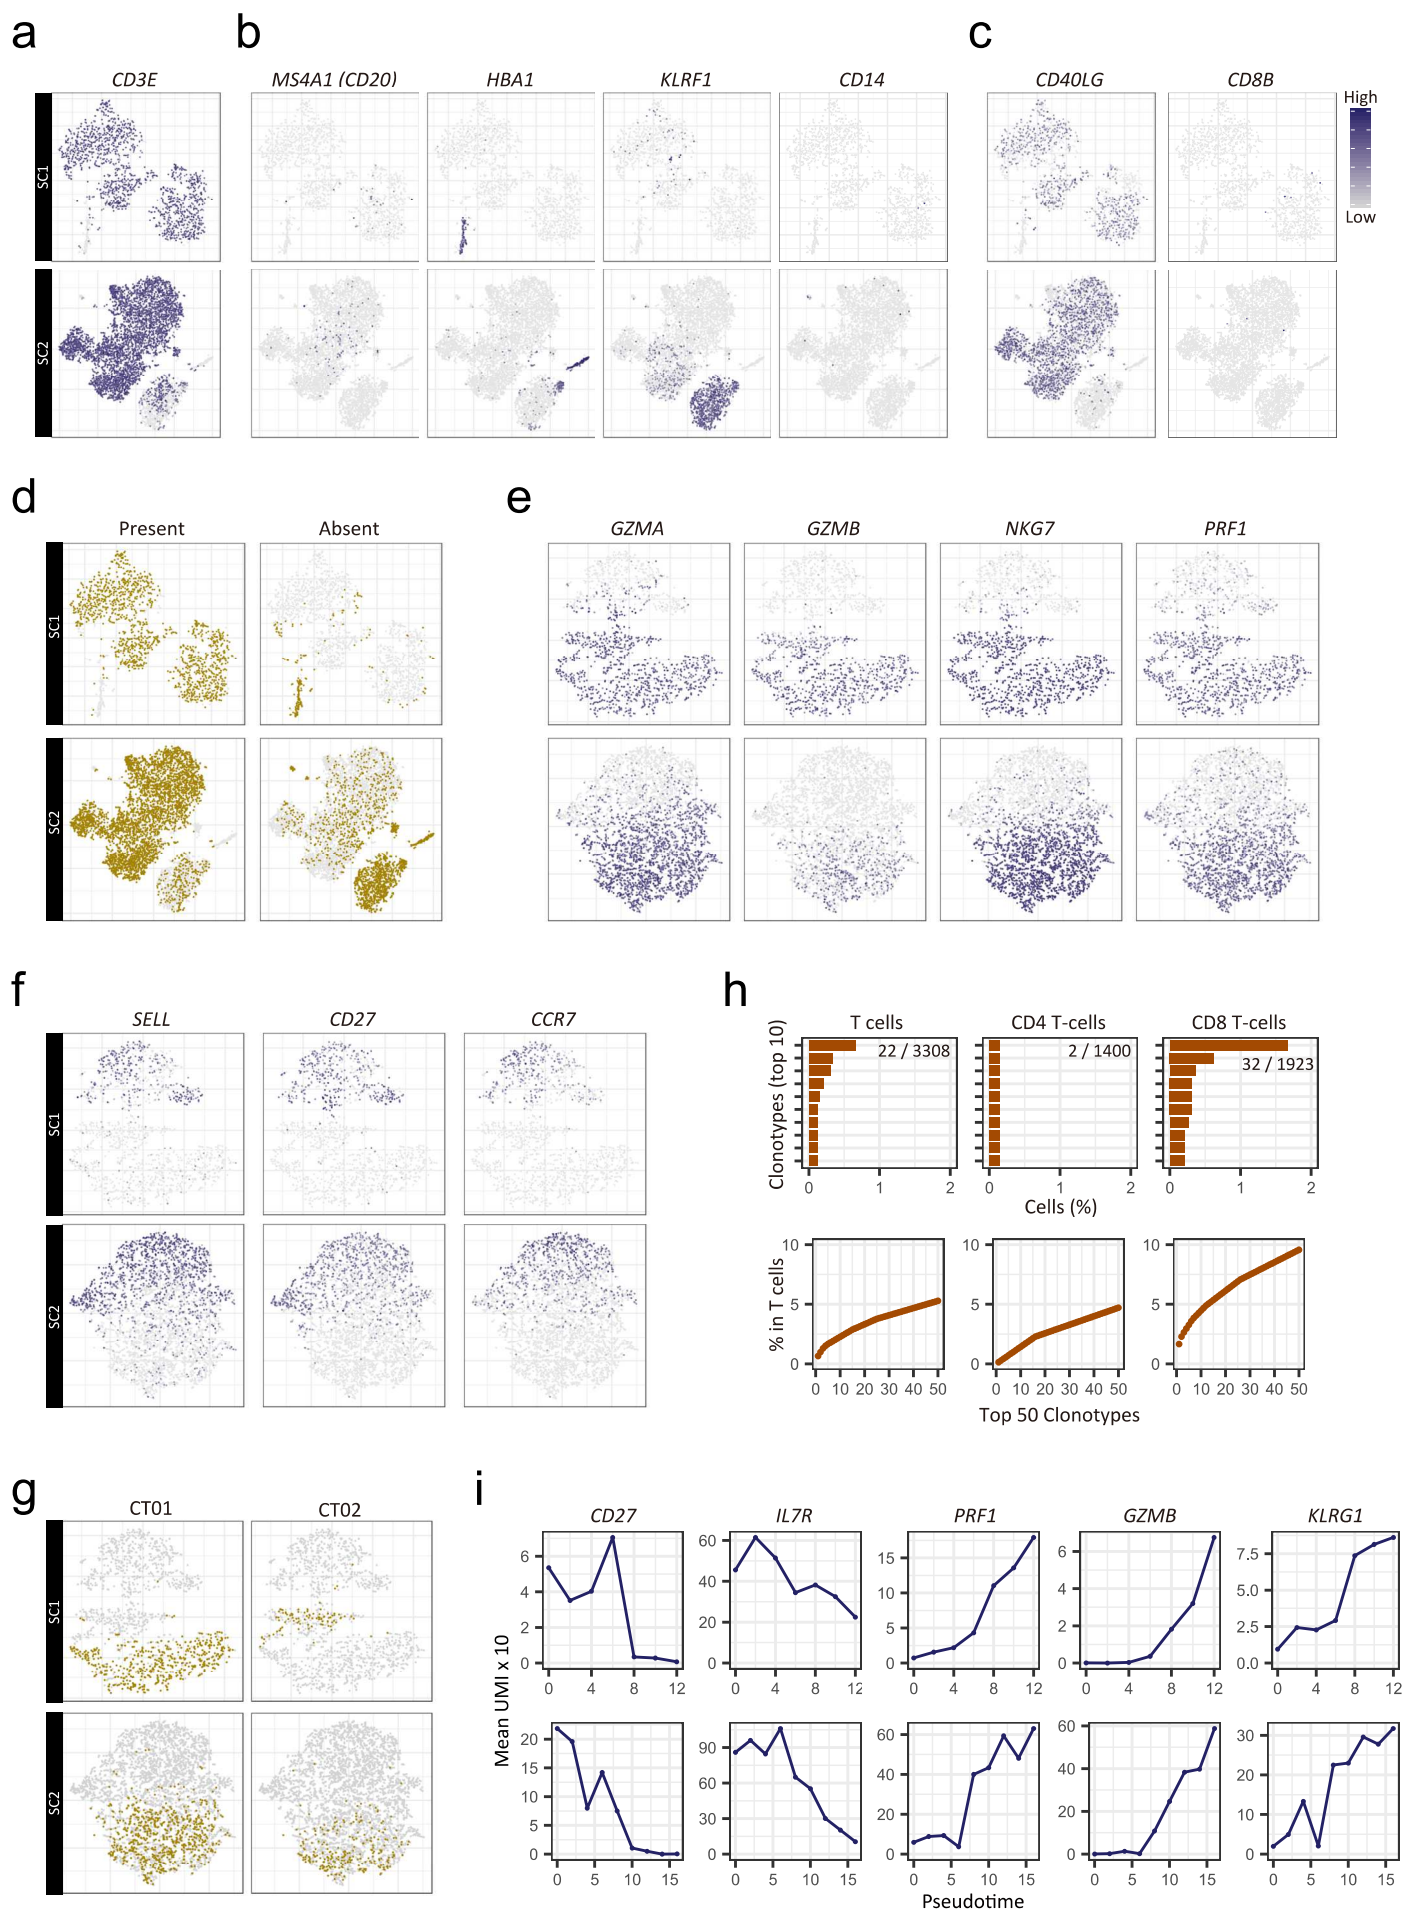

Source: https://www.biorxiv.org/content/10.1101/643528v1.full.pdf
